# Supplementary material for: Muscle stimulation in advanced idiopathic pulmonary fibrosis: a randomised placebo-controlled feasibility study
Source: PubMed Central journal article supplement — BMJ Open. 2021 Jun 2;11(6):e048808. doi: 10.1136/bmjopen-2021-048808 (PMC8174518; doi:10.1136/bmjopen-2021-048808), 2021-06-02
Supplement: bmjopen-2021-048808.draft_revisions.pdf [file bmjopen-2021-048808.draft_revisions.pdf]

# BMJ Open

BMJ Open is committed to open peer review. As part of this commitment we make the peer review history of every article we publish publicly available.

When an article is published we post the peer reviewers' comments and the authors' responses online. We also post the versions of the paper that were used during peer review. These are the versions that the peer review comments apply to.

The versions of the paper that follow are the versions that were submitted during the peer review process. They are not the versions of record or the final published versions. They should not be cited or distributed as the published version of this manuscript.

BMJ Open is an open access journal and the full, final, typeset and author-corrected version of record of the manuscript is available on our site with no access controls, subscription charges or pay-per-view fees (<http://bmjopen.bmj.com>).

If you have any questions on BMJ Open's open peer review process please email [info.bmjopen@bmj.com](mailto:info.bmjopen@bmj.com)

# BMJ Open

## Muscle stimulation in advanced idiopathic pulmonary fibrosis: a randomised placebo-controlled feasibility study

|                               |                                                                                                                                                                                                                                                                                                                                                                                                                                                                                                                                                                                                                                                                                                                                                                                                                                                                                                                                                                                                                                                                                                                                                                                                                                                                                                                                                                                                                                                                                                                                                                                                                                                                                                                                                                                                                                                                                                                                                                                                                                                                                                                                                                                                                                             |
|-------------------------------|---------------------------------------------------------------------------------------------------------------------------------------------------------------------------------------------------------------------------------------------------------------------------------------------------------------------------------------------------------------------------------------------------------------------------------------------------------------------------------------------------------------------------------------------------------------------------------------------------------------------------------------------------------------------------------------------------------------------------------------------------------------------------------------------------------------------------------------------------------------------------------------------------------------------------------------------------------------------------------------------------------------------------------------------------------------------------------------------------------------------------------------------------------------------------------------------------------------------------------------------------------------------------------------------------------------------------------------------------------------------------------------------------------------------------------------------------------------------------------------------------------------------------------------------------------------------------------------------------------------------------------------------------------------------------------------------------------------------------------------------------------------------------------------------------------------------------------------------------------------------------------------------------------------------------------------------------------------------------------------------------------------------------------------------------------------------------------------------------------------------------------------------------------------------------------------------------------------------------------------------|
| Journal:                      | <i>BMJ Open</i>                                                                                                                                                                                                                                                                                                                                                                                                                                                                                                                                                                                                                                                                                                                                                                                                                                                                                                                                                                                                                                                                                                                                                                                                                                                                                                                                                                                                                                                                                                                                                                                                                                                                                                                                                                                                                                                                                                                                                                                                                                                                                                                                                                                                                             |
| Manuscript ID                 | bmjopen-2021-048808                                                                                                                                                                                                                                                                                                                                                                                                                                                                                                                                                                                                                                                                                                                                                                                                                                                                                                                                                                                                                                                                                                                                                                                                                                                                                                                                                                                                                                                                                                                                                                                                                                                                                                                                                                                                                                                                                                                                                                                                                                                                                                                                                                                                                         |
| Article Type:                 | Original research                                                                                                                                                                                                                                                                                                                                                                                                                                                                                                                                                                                                                                                                                                                                                                                                                                                                                                                                                                                                                                                                                                                                                                                                                                                                                                                                                                                                                                                                                                                                                                                                                                                                                                                                                                                                                                                                                                                                                                                                                                                                                                                                                                                                                           |
| Date Submitted by the Author: | 15-Jan-2021                                                                                                                                                                                                                                                                                                                                                                                                                                                                                                                                                                                                                                                                                                                                                                                                                                                                                                                                                                                                                                                                                                                                                                                                                                                                                                                                                                                                                                                                                                                                                                                                                                                                                                                                                                                                                                                                                                                                                                                                                                                                                                                                                                                                                                 |
| Complete List of Authors:     | <p>Nolan, Claire; Royal Brompton and Harefield NHS Foundation Trust, Harefield Respiratory Research Group; Imperial College London, National Heart and Lung Institute</p> <p>Patel, Suhani; Royal Brompton and Harefield NHS Foundation Trust, Harefield Respiratory Research Group; Imperial College London, National Heart and Lung Institute</p> <p>Barker, Ruth; Royal Brompton and Harefield NHS Foundation Trust, Harefield Respiratory Research Group; Imperial College London, National Heart and Lung Institute</p> <p>Walsh, Jessica; Royal Brompton and Harefield NHS Foundation Trust, Harefield Respiratory Research Group</p> <p>Polgar, Oliver; Royal Brompton and Harefield NHS Foundation Trust, Harefield Respiratory Research Group</p> <p>Maddocks, Matthew; King's College London, Cicely Saunders Institute of Palliative Care, Policy &amp; Rehabilitation</p> <p>George , Peter M ; Royal Brompton and Harefield NHS Foundation Trust, Interstitial Lung Disease Unit; Imperial College London, National Heart and Lung Institute</p> <p>Renzoni, Elisabetta A.; Royal Brompton and Harefield NHS Foundation Trust, Interstitial Lung Disease Unit; Imperial College London, National Heart and Lung Institute</p> <p>Wells, Athol ; Royal Brompton and Harefield NHS Foundation Trust, Interstitial Lung Disease Unit; Imperial College London, National Heart and Lung Institute</p> <p>Molyneaux, Philip ; Royal Brompton and Harefield NHS Foundation Trust, Interstitial Lung Disease Unit; Imperial College London, National Heart and Lung Institute</p> <p>Kouranos, Vasilis; Royal Brompton and Harefield NHS Foundation Trust, Interstitial Lung Disease Unit; Imperial College London, National Heart and Lung Institute</p> <p>Chua, Felix; Royal Brompton and Harefield NHS Foundation Trust, Interstitial Lung Disease Unit; Imperial College London, National Heart and Lung Institute</p> <p>Maher, Toby; Imperial College London, National Heart and Lung Institute; University of Southern California, Keck Medicine</p> <p>Man, William; Royal Brompton and Harefield NHS Foundation Trust, Harefield Respiratory Research Group; Imperial College London, National Heart and Lung Institute</p> |
| Keywords:                     | Interstitial lung disease < THORACIC MEDICINE, REHABILITATION MEDICINE, RESPIRATORY MEDICINE (see Thoracic Medicine)                                                                                                                                                                                                                                                                                                                                                                                                                                                                                                                                                                                                                                                                                                                                                                                                                                                                                                                                                                                                                                                                                                                                                                                                                                                                                                                                                                                                                                                                                                                                                                                                                                                                                                                                                                                                                                                                                                                                                                                                                                                                                                                        |

1  
2  
3  
4  
5  
6  
7  
8  
9  
10  
11  
12  
13  
14  
15  
16  
17  
18  
19  
20  
21  
22  
23  
24  
25  
26  
27  
28  
29  
30  
31  
32  
33  
34  
35  
36  
37  
38  
39  
40  
41  
42  
43  
44  
45  
46  
47  
48  
49  
50  
51  
52  
53  
54  
55  
56  
57  
58  
59  
60

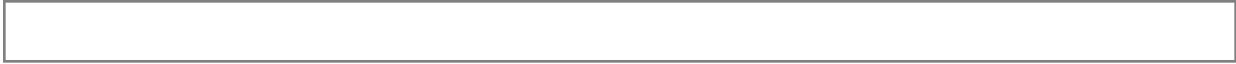

SCHOLARONE™  
Manuscripts

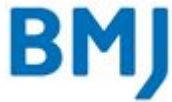

I, the Submitting Author has the right to grant and does grant on behalf of all authors of the Work (as defined in the below author licence), an exclusive licence and/or a non-exclusive licence for contributions from authors who are: i) UK Crown employees; ii) where BMJ has agreed a CC-BY licence shall apply, and/or iii) in accordance with the terms applicable for US Federal Government officers or employees acting as part of their official duties; on a worldwide, perpetual, irrevocable, royalty-free basis to BMJ Publishing Group Ltd ("BMJ") its licensees and where the relevant Journal is co-owned by BMJ to the co-owners of the Journal, to publish the Work in this journal and any other BMJ products and to exploit all rights, as set out in our [licence](#).

The Submitting Author accepts and understands that any supply made under these terms is made by BMJ to the Submitting Author unless you are acting as an employee on behalf of your employer or a postgraduate student of an affiliated institution which is paying any applicable article publishing charge ("APC") for Open Access articles. Where the Submitting Author wishes to make the Work available on an Open Access basis (and intends to pay the relevant APC), the terms of reuse of such Open Access shall be governed by a Creative Commons licence – details of these licences and which [Creative Commons](#) licence will apply to this Work are set out in our licence referred to above.

Other than as permitted in any relevant BMJ Author's Self Archiving Policies, I confirm this Work has not been accepted for publication elsewhere, is not being considered for publication elsewhere and does not duplicate material already published. I confirm all authors consent to publication of this Work and authorise the granting of this licence.

**Muscle stimulation in advanced idiopathic pulmonary fibrosis: a randomised placebo-controlled feasibility study**

|    |                                          |                            |
|----|------------------------------------------|----------------------------|
| 6  | Dr Claire M. Nolan PhD <sup>1,2</sup>    | c.nolan@rbht.nhs.uk        |
| 8  | Ms. Suhani Patel MSc <sup>1,2</sup>      | s.patel1@rbht.nhs.uk       |
| 11 | Ms Ruth E. Barker MSc <sup>1,2</sup>     | r.barker2@rbht.nhs.uk      |
| 13 | Ms Jessica Walsh <sup>1</sup>            | j.walsh@rbht.nhs.uk        |
| 16 | Mr Oliver Polgar MSc <sup>1</sup>        | o.polgar@rbht.nhs.uk       |
| 18 | Dr Matthew Maddocks PhD <sup>3</sup>     | matthew.maddocks@kcl.ac.uk |
| 21 | Dr Peter M George PhD <sup>2,4</sup>     | p.george@rbht.nhs.uk       |
| 23 | Dr Elisabetta A Renzoni <sup>2,4</sup>   | e.renzoni@rbht.nhs.uk      |
| 25 | Prof Athol U Wells <sup>2,4</sup>        | a.wells@rbht.nhs.uk        |
| 28 | Dr Philip L Molyneux PhD <sup>2,4</sup>  | p.molyneux@rbht.nhs.uk     |
| 30 | Dr Vasilis Kouranos PhD <sup>2,4</sup>   | v.kouranos@rbht.nhs.uk     |
| 33 | Dr Felix Chua PhD <sup>2,4</sup>         | f.chua@rbht.nhs.uk         |
| 35 | Professor Toby M Maher <sup>2,4,5</sup>  | toby.maher@usc.edu         |
| 37 | Dr William D-C. Man PhD <sup>1,2,6</sup> | w.man@rbht.nhs.uk          |

**Affiliations:**

1. Harefield Respiratory Research Group, Royal Brompton and Harefield NHS Foundation Trust, UK
2. National Heart and Lung Institute, Imperial College London, UK
3. King's College London, Cicely Saunders Institute of Palliative Care, Policy & Rehabilitation, UK
4. Interstitial Lung Disease Unit, Royal Brompton and Harefield NHS Foundation Trust, UK
5. Keck Medicine, University of Southern California, USA
6. Harefield PR Unit, Royal Brompton and Harefield NHS Foundation Trust, UK

1 **Corresponding author:** Dr Claire Nolan, Senior Research Physiotherapist, Royal Brompton and Harefield  
2  
3 NHS Foundation Trust, Harefield Hospital, Middlesex, UB9 6JH, United Kingdom, Tel: +44 (0)1895 828851,  
4  
5 Email: c.nolan@rbht.nhs.uk  
6  
7  
8  
9

10  
11 **Word count:**  
12

- 13 • Body: 3988  
14  
15  
16  
17

18 **Figures and tables:**  
19

- 20  
21 • Number of figures: 1  
22  
23 • Number of tables: 4  
24  
25  
26  
27  
28  
29  
30  
31  
32  
33  
34  
35  
36  
37  
38  
39  
40  
41  
42  
43  
44  
45  
46  
47  
48  
49  
50  
51  
52  
53  
54  
55  
56  
57  
58  
59  
60

For peer review only

**ABSTRACT**

Objectives: To assess the acceptability of neuromuscular electrical stimulation (NMES) of the quadriceps muscles in people with idiopathic pulmonary fibrosis (IPF) and to identify whether a future definitive trial is feasible.

Design: A randomised, parallel, two-group, participant- and assessor-blinded, placebo-controlled feasibility trial with embedded qualitative interviews.

Setting: Outpatient department, Royal Brompton and Harefield NHS Foundation Trust.

Participants: Twenty-two people with IPF: median (25<sup>th</sup>, 75<sup>th</sup> centile) age 76 (74, 82) years, forced vital capacity 62 (50, 75) %predicted, six minute walk test distance 289 (149, 360) metres.

Interventions: Usual care (home-based exercise, weekly telephone support, breathlessness management leaflet) with either placebo or active NMES for six weeks, with follow up at six- and 12-weeks.

Primary outcome measures: Feasibility of recruitment and retention, treatment uptake and adherence, outcome assessments, participant and outcome assessor blinding and adverse events related to interventions.

Secondary outcome measures: Outcome measures with potential to be primary or secondary outcomes in a definitive clinical trial. In addition, purposively sampled participants were interviewed to capture their experiences and acceptability of the trial.

Results: Out of 364 people screened, 23 were recruited: 11 were allocated to each group and one was withdrawn prior to randomisation. Compared to the control group, a greater proportion of the intervention group completed the intervention, remained in the trial blinded to group allocation and experienced intervention-related adverse events. Assessor-blinding was maintained. The secondary outcome measures were feasible with most missing data associated with the accelerometer. Small participant numbers precluded identification of an outcome measure suitable for a definitive trial.

1 Qualitative findings demonstrated that trial process and active NMES were acceptable but there were  
2  
3 concerns about the credibility of placebo NMES.  
4  
5

6 Conclusions: A definitive trial using the current protocol to evaluate NMES in people with IPF is not  
7  
8 feasible.  
9  
10

11 Trial registration: [clinicaltrials.gov NCT03499275](https://clinicaltrials.gov/ct2/show/study/NCT03499275)  
12  
13  
14  
15  
16  
17

## 18 Article Summary

- 21 1. This is the first study to examine the feasibility of neuromuscular electrical stimulation in people  
22 with idiopathic pulmonary fibrosis.  
23
- 24 2. The intervention was developed using a combination of patient and public involvement feedback  
25 and previously published studies.  
26
- 27 3. We blinded the outcome assessor to group allocation and used an existing placebo neuromuscular  
28 electrical stimulator device to blind participants in the control group.  
29
- 30 4. We conducted qualitative interviews to capture participant experiences.  
31
- 32 5. The study took place at a single site may have been a limiting factor for participant recruitment.  
33  
34  
35  
36  
37  
38  
39  
40  
41  
42  
43  
44  
45  
46  
47  
48  
49  
50  
51  
52  
53  
54  
55  
56  
57  
58  
59  
60



## INTRODUCTION

Idiopathic pulmonary fibrosis (IPF) is characterised by progressive dyspnoea, reduction in functional capacity and subsequent loss of independence.<sup>1,2</sup> Several factors contribute to this, including declining lung function and peripheral muscle weakness.<sup>3</sup> There is growing interest in the latter, as it is known that people with IPF have smaller rectus femoris cross-sectional area<sup>4</sup> as well as reduced quadriceps strength<sup>3-5</sup> and endurance<sup>5</sup> compared to matched healthy controls.

The National Institute for Health and Care Excellence (NICE) recommends regular assessment for and offering pulmonary rehabilitation (PR) to people with IPF.<sup>6</sup> However, people with advanced disease and severe breathlessness may have difficulties undertaking PR as ventilatory limitation may preclude effective whole body training.<sup>7</sup> Centre-based PR or exercise programme completion rates range from 43%<sup>8</sup> to 94%.<sup>9</sup> People with more severe disease and those unwilling to participate in group programmes are less likely to complete these programmes.<sup>10</sup> Accordingly, home-based ways of conferring the benefits of exercise are required.

Guidance from NICE states that in people not suitable for, or unable to participate in, existing rehabilitation programmes, neuromuscular electrical stimulation (NMES) of the quadriceps offers an alternative means of enhancing muscle strength.<sup>11</sup> NMES uses a small battery-operated stimulator which, via surface electrodes placed on the anterior thigh, produces a controlled contraction and relaxation of the underlying muscles. It is safe, relatively inexpensive and is performed seated at home. In people with advanced chronic disease including COPD, heart failure, and cancer, a meta-analysis demonstrated that compared to placebo, NMES led to a significant improvement in quadriceps strength, muscle mass and exercise capacity.<sup>12</sup> Therefore, NMES may be a potential treatment for muscle weakness in advanced progressive disease and could be considered a suitable home intervention for people with muscle weakness who have difficulty engaging with existing PR services.<sup>11,12</sup> To date there are no studies exploring the role or effects of

1 NMES in IPF. Therefore, we aimed to determine the acceptability of NMES of the quadriceps in people with  
2 IPF and to identify whether a future definitive trial is feasible.  
3  
4  
5  
6

## 7 **MATERIALS AND METHODS**

8  
9

### 10 **Study design and subjects**

11

12 We conducted a randomised, parallel, two-group, participant- and assessor-blinded, placebo-controlled  
13 feasibility trial with embedded qualitative interviews. The trial was conducted and reported according to  
14 the CONSORT 2010 statement: extension to randomised pilot and feasibility trials.<sup>13</sup> Participants were  
15 recruited from outpatient clinics at the Royal Brompton and Harefield NHS Foundation Trust, UK between  
16 November 2018 and February 2020. The inclusion criteria were 1) diagnosis of IPF according to  
17 international guidelines,<sup>14</sup> 2) Medical Research Council (MRC) dyspnoea score  $\geq 3$ , 3) quadriceps maximum  
18 voluntary contraction (QMVC)  $< 80\%$  predicted, 4) declined or failed to complete supervised centre-based  
19 PR and 5) ability to provide informed consent. People were excluded for the following reasons 1) cardiac  
20 pacemaker, 2) co-existing neurological condition e.g. lower limb paralysis, 3) completion of PR within the  
21 previous six months, 4) change in medication and/or exacerbation requiring hospitalisation within the  
22 previous four weeks or 5) current regular exerciser (structured exercise  $\geq 3$ /week in the previous month).  
23 All participants provided written informed consent. The trial was pre-registered on clinicaltrials.gov  
24 (NCT03499275) and the study was approved by London-Harrow Research Ethics Committee and Health  
25 Research Authority (18/LO/0209).  
26  
27  
28  
29  
30  
31  
32  
33  
34  
35  
36  
37  
38  
39  
40  
41  
42  
43  
44  
45  
46  
47

### 48 **Randomisation and blinding**

49

50 Following baseline assessment, participants were randomly allocated 1:1 at the individual level to receive  
51 active or placebo NMES. Minimization was used to balance groups for age ( $< 65$  years vs.  $\geq 65$  years), sex  
52 (male vs. female) and quadriceps strength ( $< 20$ kg vs.  $\geq 20$ kg). The allocation sequence was generated using  
53 an independent web-based randomisation system within the UK Clinical Research Collaboration-registered  
54  
55  
56  
57  
58  
59  
60

1 King's Clinical Trials Unit. Following randomisation, the Clinical Trials Unit informed trial staff by secure  
2 email. An unblinded researcher selected an active or placebo device accordingly. Blinded researchers  
3 were informed of trial entry but not group allocation. The participant was not informed of group allocation.  
4  
5 Subsequent assessment visits were completed immediately after the six-week intervention period and at  
6  
7 12 weeks by a researcher blinded to group allocation. Qualitative in-depth, topic-guided interviews were  
8  
9 completed in a sub-group of participants who were selected purposively to include both intervention and  
10  
11 control groups, sexes, and a range of baseline MRC scores so that different perspectives could be explored.  
12  
13  
14  
15  
16  
17

## 18 **Interventions**

19  
20  
21 The treating healthcare professionals provided potential participants with the study information leaflet  
22  
23 who were then screened by the research team via telephone. Those interested in participating in the study  
24  
25 attended an assessment to confirm eligibility.  
26  
27  
28

29  
30 The interventions were based on a combination of patient and public involvement feedback and published  
31  
32 studies.<sup>15</sup> The NMES programme was a self-administered, home-based protocol involving 30 minutes  
33  
34 stimulation of bilateral quadriceps muscles for six weeks. The active device was KneeHab<sup>®</sup>XP (Neurotech,  
35  
36 USA) and the placebo device, MicroStim Exercise Stimulator MS2v2 (Odstock Medical Ltd, UK).  
37  
38 Although different machines were used for the active and placebo devices, they were outwardly identical  
39  
40 as both were covered in the same garment (online supplement). The parameters of both devices were the  
41  
42 same (frequency 50Hz, pulse width 400µs, duty cycle 18–33% which increased weekly for the first three  
43  
44 weeks) except for the amplitude range (active: 0-120mA; placebo: 0-20mA). Consequently, participants in  
45  
46 the control group received sensory feedback during stimulation but the device did not elicit a tetanic  
47  
48 muscle contraction.  
49  
50  
51  
52  
53

54  
55 Participants in both groups also received a leaflet on how to manage breathlessness and an individualised  
56  
57 home exercise programme supplemented with a manual which they were instructed to perform at least  
58  
59 three times per week (online supplement).  
60

1 The unblinded researcher delivered a standardised 40-minute training session to participants in both  
2 groups to demonstrate and supervise NMES application and the home exercise programme. Participants  
3 were provided with a diary to record NMES and exercise performance. During the six-week intervention  
4 period, the unblinded researcher telephoned participants weekly to review and progress NMES use and  
5 home exercise performance. To progress NMES, participants were asked to increase the amplitude of the  
6 electrical current, within the limits of the device.  
7  
8  
9  
10  
11  
12  
13  
14

## 15 **Outcome measures**

### 16 **Primary outcome measures**

17  
18  
19 The primary outcomes were related to feasibility: participant recruitment and retention, treatment uptake  
20 and adherence, feasibility of outcome assessments, feasibility of participant and assessor blinding and  
21 adverse events related to the interventions. To assess recruitment- and retention-related feasibility  
22 outcomes, the numbers of potential eligible participants as well as recruitment and retention rates at the  
23 six- and 12-week assessments were recorded. To assess treatment uptake and adherence, the following  
24 were recorded; feasibility, outcomes, rates of uptake of and adherence to the allocated intervention and  
25 frequency and time spent using the NMES device and performing the home exercise programme.  
26 Feasibility of outcome assessment was measured by recording the amount of missing data for each  
27 outcome measure at each assessment. Participant and assessor blinding were assessed by the unblinded  
28 researcher at the six-week assessment, and six- and 12-week assessment respectively. Research staff  
29 recorded adverse events during assessment visits and weekly telephone calls. These were classified as  
30 related or unrelated to the allocated intervention, using as much information as available to determine the  
31 potential attribution of the event.  
32  
33  
34  
35  
36  
37  
38  
39  
40  
41  
42  
43  
44  
45  
46  
47  
48  
49  
50  
51  
52

### 53 **Secondary outcome measures**

54  
55 The secondary outcome measures were those that had the potential to be primary or secondary outcomes  
56 in a definitive clinical trial. These were: exercise capacity (six-minute walk test-6MWT),<sup>16</sup> functional  
57  
58  
59  
60

performance (Short Physical Performance Battery-SPPB),<sup>17</sup> four metre gait speed (4MGS),<sup>18</sup> rectus femoris size (ultrasound of rectus femoris cross-sectional area (Mindray DP-50, Caiyside Imaging Ltd., Scotland), quadriceps strength (isometric QMVC),<sup>19</sup> health-related quality of life (King's Brief Interstitial Lung Disease questionnaire-KBILD),<sup>20</sup> activities of daily living (London Chest Activities of Daily Living-LCADL),<sup>21</sup> and physical activity parameters (daily step count, time spent in sedentary, light and moderate intensity activity (SenseWear, Bodymedia, USA)).<sup>22</sup>

Following the 12-week assessment, purposively sampled participants were invited to take part in semi-structured, topic-guided, telephone-based interviews. The audio-recorded interviews explored experiences of the intervention, how it impacted perceptions of outcome, acceptability of outcome measures and trial conduct in order to inform the rationale for and conduct of a definitive trial. The topic guides were updated inductively to reflect experiences and perceptions raised during previous interviews.

### **Sample size**

Sample size estimation was performed to achieve the primary feasibility outcomes, and not to detect differences in the secondary outcome measures. Based on guidance in the literature, we estimated that a sample size of 60 (30 per group) would be sufficient to adequately evaluate the feasibility of undertaking a definitive trial. A sample size of ten was chosen for the qualitative interviews as it was based on the predicted minimum number of interviews required to achieve data saturation and is based on the concept of Information Power.<sup>23</sup>

### **Statistical analysis**

The feasibility outcomes and baseline demographics were described and summarised overall and by trial group using proportions (percentage) or median (25<sup>th</sup>, 75<sup>th</sup> centile). The baseline data and change at six and 12 weeks was reported as median (25<sup>th</sup>, 75<sup>th</sup> centile) or median (25<sup>th</sup>, 75<sup>th</sup> centile) change for each trial group.

1 Anonymised interview transcripts were transcribed verbatim and imported into NVIVO (QSR International,  
2 Australia) to facilitate analysis using the Framework Method.<sup>24</sup> The coding frame was pre-defined and  
3 included experiences of the interventions, impact of intervention on perceived outcome, acceptability and  
4 experiences of trial conduct and acceptability of the outcome measures. During indexing, secondary codes  
5 were inductively applied. A mixed-method matrix<sup>25</sup> of qualitative and key quantitative data was used to  
6 illuminate barriers and facilitators for intervention completion by participants to inform protocol  
7 adaptation and/or optimisation.  
8  
9

### 18 Patient and public involvement (PPI)

21 This research has included PPI throughout each stage. Two PPI representatives were involved in the design  
22 of the study and intervention, and met the project manager at regular intervals throughout the study. The  
23 PPI representatives also provided input into written material for participants and topic guides for  
24 qualitative interviews. Going forward, they will have a role in dissemination of research findings to lay  
25 audiences.  
26  
27  
28  
29  
30  
31  
32  
33  
34  
35  
36  
37  
38

## 39 **RESULTS**

### 41 **Primary outcome**

#### 45 Feasibility of recruitment and retention

48 We screened 364 people, of whom 153 were assessed for eligibility and 23 consented to participate in the  
49 study: 11 were allocated to both the intervention and control groups and one was withdrawn prior to  
50 randomisation for safety reasons (figure 1). By far the most common reason for failing the telephone-  
51 based screening assessment was the distance participants were required to travel to the research centre  
52 (n=153). MRC<3 (n=55) or PR completion within six months (n=24) were the most common reasons for  
53 failing the eligibility assessment. At the six-week assessment, two participants in both groups were lost to  
54  
55  
56  
57  
58  
59  
60

1 follow-up (intervention: n=2 missed visit, control: n=2 withdrew from the study). At the 12-week  
 2 assessment, all participants in the intervention group were assessed whereas three participants in the  
 3 control group were lost to follow-up (withdrew from the study).  
 4  
 5  
 6  
 7

#### 8 Feasibility of treatment uptake and adherence 9

10  
 11 All participants started their allocated intervention. Both groups received the same median number of  
 12 weekly telephone calls but there was a trend for higher frequency and duration of use of the NMES device  
 13 and home exercise programme in the intervention compared to the control group (table 1). All  
 14 participants in the intervention group completed the allocated intervention. In contrast, four participants  
 15 in the control group discontinued the intervention: n=2: did not tolerate placebo NMES, n=1 unwell, n=1:  
 16 felt NMES was ineffective.  
 17  
 18  
 19  
 20  
 21  
 22  
 23  
 24  
 25  
 26  
 27  
 28  
 29  
 30

31 Table 1. Intervention uptake, adherence and completion  
 32

| 33 Variable                                        | 34 Intervention    | 35 Control         |
|----------------------------------------------------|--------------------|--------------------|
| 36 Number of weekly telephone calls                | 37 6 (5, 6)        | 38 6 (4, 6)        |
| 39 Number of times device* used between V1 and V2  | 40 31 (22, 44)     | 41 24 (4, 40)      |
| 42 Total minutes device* used between V1 and V2    | 43 930 (660, 1110) | 44 570 (120, 1230) |
| 45 Number of times HEP performed between V1 and V2 | 46 20 (17, 32)     | 47 14 (4, 26)      |
| 48 Total minutes HEP performed between V1 and V2   | 49 906 (600, 1527) | 50 648 (110, 1399) |

51 Data reported number or median (25<sup>th</sup>, 75<sup>th</sup>) centile.

52 \*Device: Intervention group: Active stimulator; Control group: Placebo stimulator.

53 Abbreviations: HEP: Home Exercise Programme; NC: Not Computed; V: Visit.  
 54  
 55  
 56  
 57

#### 58 Feasibility of outcome assessment 59 60

1 Missing data for each clinical outcome according to assessment timepoint are described in the online  
2 supplement. There were no missing data at the baseline assessment. Missing data at the six- and 12-week  
3 assessments mostly related to participants that were lost to follow up. The outcome measures with the  
4 most missing data were the physical activity parameters (intervention, control: baseline: n=4, n=4; six and  
5 12 weeks: n=5, n=6). Reasons for missingness included participants declining to wear the device and  
6 insufficient data to analyse.  
7  
8  
9  
10  
11  
12  
13  
14  
15  
16  
17  
18

### 19 Feasibility of participant and outcome assessor blinding

20  
21  
22 Participant blinding was maintained in the intervention group but three participants in the control group  
23 were unblinded as they did not believe the placebo NMES was credible. The outcome assessor remained  
24 blinded to intervention allocation of all participants.  
25  
26  
27  
28  
29

### 30 Adverse and serious adverse events

31  
32  
33 There was one serious adverse event in the intervention group and four in the control group. None of  
34 these events were unexpected or related to the allocated intervention or assessments. One participant  
35 experienced two adverse events prior to randomisation. A total of 10 and five adverse events in the  
36 intervention and control groups were experienced by eight and four participants respectively. None of the  
37 events prior to randomisation or in the control group were unexpected or related to the study. Three  
38 adverse events in the intervention group were expected and related to the study. These included redness  
39 on anterior thigh and itchiness on anterior thigh following NMES use as well as “burning sensation” on  
40 anterior thigh during NMES use. The remaining seven adverse events were expected and unrelated to the  
41 intervention.  
42  
43  
44  
45  
46  
47  
48  
49  
50  
51  
52  
53  
54  
55  
56  
57  
58  
59  
60

### 60 Secondary outcomes



The groups were balanced in terms of age, gender, disease severity, body mass index and quadriceps strength (table 2). However, compared to the intervention group, the control group had a greater proportion of participants diagnosed with pulmonary hypertension, prescribed supplementary oxygen and former smokers as well as worse exercise capacity, activities of daily life performance, walking speed and physical activity levels. Due to the small number of participants in each group, it was not possible to test for between-group differences.

Table 2. Baseline characteristics

|                                                        | <b>Whole group (n=22)</b> | <b>Intervention (n=11)</b> | <b>Control (n=11)</b>   |
|--------------------------------------------------------|---------------------------|----------------------------|-------------------------|
| Gender: male (%)                                       | 16 (73)                   | 7 (64)                     | 8 (73)                  |
| Age (years)                                            | 76 (74, 82)               | 77 (73, 81)                | 76 (74, 84)             |
| MRC Dyspnoea score                                     | 4 (4, 4)                  | 4 (4, 4)                   | 4 (4, 4)                |
| BMI (kg/m <sup>2</sup> )                               | 24.4 (22.4, 29.1)         | 24.2 (22.0, 26.5)          | 25.2 (22.6, 29.2)       |
| FEV <sub>1</sub> /FVC                                  | 0.84 (0.78, 0.86)         | 0.80 (0.77, 0.85)          | 0.84 (0.78, 0.87)       |
| FVC (L)                                                | 1.83 (1.39, 2.44)         | 1.83 (1.44, 2.45)          | 1.82 (1.22, 2.44)       |
| FVC (% predicted)                                      | 61.8 (49.8, 75.0)         | 63.0 (49.0, 78.2)          | 60.5 (50.0, 68.0)       |
| Smoking status: never/former/current: (%)              | 13 (59) / 9 (41) / 0 (0)  | 7 (64) / 4 (36) / 0 (0)    | 6 (55) / 5 (45) / 0 (0) |
| Smoking pack year history                              | 0 (0, 8)                  | 0 (0, 5)                   | 0 (0, 13)               |
| Age-adjusted Charlson Co-morbidity Index               | 2 (0, 5)                  | 4 (0, 5)                   | 0 (0, 6)                |
| COPD: n (%)                                            | 3 (14)                    | 1 (10)                     | 2 (18)                  |
| Pulmonary hypertension: n (%)                          | 2 (9)                     | 0 (0)                      | 2 (18)                  |
| Ischaemic heart disease: n (%)                         | 8 (36)                    | 5 (46)                     | 3 (27)                  |
| Obstructive sleep apnoea: n (%)                        | 0 (0)                     | 0 (0)                      | 0 (0)                   |
| Self-reported hospitalisations in previous year: n (%) | 0 (0, 0)                  | 0 (0, 0)                   | 0 (0, 0)                |
| Self-reported chest infections in previous year: n (%) | 1 (1, 2)                  | 1 (1, 2)                   | 1 (1, 1)                |
| Oxygen: n (%)                                          |                           |                            |                         |
| Long-term                                              | 4 (18)                    | 1 (10)                     | 3 (27)                  |
| Ambulatory                                             | 9 (41)                    | 4 (36)                     | 5 (46)                  |

|                                                        |                   |                   |                   |
|--------------------------------------------------------|-------------------|-------------------|-------------------|
| Walking aid: n (%)                                     | 5 (23)            | 2 (18)            | 3 (27)            |
| Prescribed pirfenidone: n (%)                          | 6 (27)            | 4 (36)            | 2 (18)            |
| Prescribed nintedanib: n (%)                           | 7 (32)            | 4 (36)            | 3 (27)            |
| 6MWT (m)                                               | 289 (149, 360)    | 326 (150, 361)    | 240 (130, 325)    |
| SPPB score                                             | 9 (6, 11)         | 10 (6, 11)        | 7 (4, 11)         |
| Four metre gait speed (m/s)                            | 0.71 (0.50, 0.94) | 0.82 (0.38, 0.97) | 0.66 (0.51, 0.84) |
| QMVC (kg)                                              | 22.4 (15.6, 28.7) | 22.5 (15.1, 28.3) | 22.4 (15.7, 31.3) |
| Rectus femoris cross-sectional area (mm <sup>2</sup> ) | 459 (371, 534)    | 451 (321, 579)    | 479 (375, 581)    |
| KBILD - Psychological                                  | 54.4 (53.2, 69.1) | 58.8 (41.2, 71.6) | 53.5 (43.8, 65.5) |
| KBILD – Breathlessness and activities                  | 35.6 (21.6, 45.9) | 37.8 (27.0, 50.2) | 35.6 (17.7, 41.9) |
| KBILD – Chest symptoms                                 | 68.6 (44.0, 85.2) | 63.7 (44.0, 85.2) | 73.4 (54.3, 85.2) |
| KBILD – Total score                                    | 53.5 (46.4, 59.4) | 56.1 (43.9, 66.4) | 53.5 (47.2, 56.1) |
| LCADL – Self-care                                      | 6.0 (4.0, 8.0)    | 7.0 (4.0, 8.0)    | 6.0 (4.0, 7.0)    |
| LCADL – Domestic                                       | 10.5 (4.8, 18.5)  | 5.0 (1.0, 17.0)   | 14.0 (10.0, 22.0) |
| LCADL – Physical                                       | 4.0 (3.0, 6.0)    | 4.0 (3.0, 5.0)    | 4.0 (3.0, 6.0)    |
| LCADL – Leisure                                        | 4.0 (3.0, 6.0)    | 4.0 (3.0, 6.0)    | 5.0 (4.0, 6.0)    |
| LCADL – Total score                                    | 26.0 (17.5, 37.3) | 20.0 (14.0, 28.0) | 33.0 (22.0, 29.0) |
| Daily step count                                       | 1511 (776, 3456)  | 1820 (1148, 3232) | 988 (657, 4115)   |
| Daily mins spent in moderate intensity PA              | 34 (20, 84)       | 47 (25, 100)      | 22 (5, 74)        |
| Daily mins spent in light intensity PA                 | 194 (147, 221)    | 217 (126, 248)    | 187 (153, 199)    |
| Daily mins spent sedentary                             | 1144 (1098, 1206) | 1123 (1095, 1151) | 1194 (1137, 1237) |

Data reported as number (percentage) or median (25<sup>th</sup> centile, 75<sup>th</sup> centile).

*Abbreviations: 6MWT: Six Minute Walk Test; CI: Confidence Interval; EQ5D5L: EQ5D 5-Levels; KBILD: King's Brief Interstitial Lung Disease questionnaire; LCADL: London Chest Activities of Daily Living questionnaire; P: p-value; PA: Physical Activity; QMVC: Quadriceps Maximum Voluntary Contraction; SPPB: Short Physical Performance Battery.*

*KBILD domains and total score: Range 0-100; higher scores indicate better health-related quality of life.*

*LCADL range: Self-care: 0-20; Domestic: 0-30; Physical: 0-10; Leisure: 0-15; Total: 0-75; higher scores indicate greater impact on ADL performance.*

The response to the intervention between baseline and six-week assessment, and baseline and 12-week assessment are shown in tables 3 and 4 respectively. Again, owing to the small numbers of participants, it

1 is not possible to draw firm conclusions from these data. However, between the baseline and six-week  
2 assessment, there was trend for a greater reduction in sedentary time in the intervention group, compared  
3 to an increase in sedentary time in the control group (table 3). Similarly, between the baseline and 12-  
4 week assessment, there was a trend for a greater increase in rectus femoris cross-sectional area, self-care  
5 related to activities of daily living performance and time spent in light intensity physical activity in the  
6 intervention compared to the control group (table 4).  
7  
8  
9  
10  
11  
12  
13  
14  
15  
16  
17  
18  
19  
20  
21  
22  
23  
24  
25  
26  
27  
28  
29  
30  
31  
32  
33  
34  
35  
36  
37  
38  
39  
40  
41  
42  
43  
44  
45  
46  
47  
48  
49  
50  
51  
52  
53  
54  
55  
56  
57  
58  
59  
60

For peer review only

Table 3. Draft table for the within and between group response of the secondary outcome measures to the intervention from Visit 1 to Visit 2.

| Outcome                                                  | Intervention |                         | Control |                         |
|----------------------------------------------------------|--------------|-------------------------|---------|-------------------------|
|                                                          | n            | Within group difference | n       | Within group difference |
| Δ 6MWT (m)                                               | 9            | 6 (-16, 45)             | 8       | -17 (-74, 4)            |
| Δ SPPB                                                   | 9            | 0 (-1, 1)               | 8       | 0 (0, 0)                |
| Δ Four metre gait speed (m/s)                            | 9            | 0.03 (0.01, 0.06)       | 8       | -0.04 (-0.09, 0.03)     |
| Δ QMVC (kg)                                              | 9            | -0.1 (-1.9, 2.5)        | 8       | -0.2 (-1.7, 2.0)        |
| Δ Rectus femoris cross-sectional area (mm <sup>2</sup> ) | 9            | 18.0 (-32.6, 48.3)      | 8       | 16.0 (-50.6, 33.0)      |
| Δ KBILD - Psychological                                  | 9            | 5.9 (-3.4, 12.8)        | 9       | 0 (-7.2, 9.6)           |
| Δ KBILD - Breathlessness and activities                  | 9            | 9.3 (-7.8, 13.8)        | 9       | 0 (-8.4, 13.5)          |
| Δ KBILD – Chest symptoms                                 | 9            | 9.7 (-5.9, 16.7)        | 9       | 9.7 (-5.9, 22.9)        |
| Δ KBILD – Total score                                    | 9            | 2.7 (-0.2, 7.4)         | 9       | 0.1 (-2.2, 3.9)         |
| Δ LCADL – Self-care                                      | 9            | -1.0 (-2.0, 0.0)        | 9       | 1.0 (-0.5, 1.5)         |
| Δ LCADL - Domestic                                       | 9            | 1.0 (-3.0, 4.5)         | 9       | -1.0 (-3.0, -5.0)       |
| Δ LCADL – Physical                                       | 9            | 0.0 (-0.5, 0.5)         | 9       | 0.0 (-1.0, 1.5)         |
| Δ LCADL – Leisure                                        | 9            | 0.0 (-1.0, 1.0)         | 9       | 0.0 (-1.0, 1.5)         |
| Δ LCADL – Total score                                    | 9            | 0.0 (-5.0, 2.0)         | 9       | 4.0 (-3.0, 10.0)        |
| Δ Daily step count                                       | 5            | -270 (-504, 877)        | 5       | -740 (-2026, -230)      |
| Δ Daily mins spent in moderate intensity PA              | 5            | -3 (-20, 4)             | 5       | -19 (-51, -5)           |
| Δ Daily mins spent in light intensity PA                 | 5            | 24 (5, 71)              | 5       | -39 (-65, 15)           |

|                              |   |                |   |             |
|------------------------------|---|----------------|---|-------------|
| Δ Daily mins spent sedentary | 5 | -40 (-58, -21) | 5 | 54 (22, 86) |
|------------------------------|---|----------------|---|-------------|

Data reported as median (25<sup>th</sup> centile, 75<sup>th</sup> centile) difference.

Abbreviations: 6MWT: Six Minute Walk Test; CI: Confidence Interval; EQ5D5L: EQ5D 5-Levels; KBILD: King's Brief Interstitial Lung Disease questionnaire; LCADL: London Chest Activities of Daily Living questionnaire; P: p-value; QMVC: Quadriceps Maximum Voluntary Contraction; SPPB: Short Physical Performance Battery.

KBILD domains and total score: Range 0-100; higher scores indicate better health-related quality of life.

LCADL range: Self-care: 0-20; Domestic: 0-30; Physical: 0-10; Leisure: 0-15; Total: 0-75; higher scores indicate greater impact on ADL performance.

For peer review only

Table 4. Draft table for the within and between group response of the secondary outcome measures to the intervention from Visit 1 to Visit 3.

| Outcome                                                  | Intervention |                         | Control |                         |
|----------------------------------------------------------|--------------|-------------------------|---------|-------------------------|
|                                                          | n            | Within group difference | n       | Within group difference |
| Δ 6MWT (m)                                               | 10           | -13 (-73, -15)          | 6       | -23 (-100, 18)          |
| Δ SPPB                                                   | 10           | 0 (-1, 0)               | 7       | 0 (-1, 1)               |
| Δ Four metre gait speed (m/s)                            | 10           | -0.03 (-0.14, 0.08)     | 7       | 0.01 (-0.12, 0.09)      |
| Δ QMVC                                                   | 11           | 1.0 (-0.9, 4.3)         | 7       | -1.7 (-3.4, 3.7)        |
| Δ Rectus femoris cross-sectional area (mm <sup>2</sup> ) | 11           | 32.6 (2.5, 54.4)        | 7       | -48.6 (-87.8, 10.0)     |
| Δ KBILD - Psychological                                  | 11           | 7.8 (4.6, 19.1)         | 8       | 4.2 (-4.1, 8.7)         |
| Δ KBILD - Breathlessness and activities                  | 11           | 9.3 (-7.5, 13.6)        | 8       | 0 (-10.0, 5.9)          |
| Δ KBILD – Chest symptoms                                 | 11           | 10.3 (0, 19.7)          | 8       | 10.8 (0, 24.9)          |
| Δ KBILD – Total score                                    | 11           | 5.4 (1.1, 8.8)          | 8       | 2.6 (-4.1, 4.3)         |
| Δ LCADL – Self-care                                      | 11           | -1.0 (-2.0, 0.0)        | 8       | 1.0 (0.3, 2.5)          |
| Δ LCADL - Domestic                                       | 11           | 1.0 (-1.0, 3.0)         | 8       | 4.0 (-2.5, 9.5)         |
| Δ LCADL – Physical                                       | 11           | 0.0 (-1.0, 0.0)         | 8       | 0.0 (-1.0, 1.8)         |
| Δ LCADL – Leisure                                        | 11           | 0.0 (0.0, 1.0)          | 8       | 0.5 (-0.8, 2.8)         |
| Δ LCADL – Total score                                    | 11           | 1.0 (-2.0, 5.0)         | 8       | 4.5 (0.8, 15.3)         |
| Δ Daily step count                                       | 5            | -215 (-966, 176)        | 5       | -334 (-2712, 7)         |
| Δ Daily mins spent in moderate intensity PA              | 5            | 2 (-29, 22)             | 5       | 2 (-31, -11)            |
| Δ Daily mins spent in light intensity PA                 | 5            | 37 (-46, 54)            | 5       | -3 (-61, 35)            |

|                              |   |             |   |             |
|------------------------------|---|-------------|---|-------------|
| Δ Daily mins spent sedentary | 5 | 8 (-29, 87) | 5 | 7 (-24, 50) |
|------------------------------|---|-------------|---|-------------|

Data reported as median (25<sup>th</sup> centile, 75<sup>th</sup> centile) difference.

Abbreviations: 6MWT: Six Minute Walk Test; CI: Confidence Interval; EQ5D5L: EQ5D 5-Levels; KBILD: King's Brief Interstitial Lung Disease questionnaire; LCADL: London Chest Activities of Daily Living questionnaire; P: p-value; QMVC: Quadriceps Maximum Voluntary Contraction; SPPB: Short Physical Performance Battery.

KBILD domains and total score: Range 0-100; higher scores indicate better health-related quality of life.

LCADL range: Self-care: 0-20; Domestic: 0-30; Physical: 0-10; Leisure: 0-15; Total: 0-75; higher scores indicate greater impact on ADL performance.

For peer review only

1 Six participants (four male, two female), aged between 54 and 84 years, participated in the qualitative  
2 interviews. The majority had been allocated to the intervention group, with only one participant from the  
3 control group. Despite interviewing almost one third of participants that were recruited to the trial, new  
4 data was being gained up to and including the last interview.  
5  
6  
7  
8

9  
10 All participants found the research staff, trial processes and outcome measures acceptable:

11  
12  
13  
14 *"I was able to comply with what was required,..., other than the fact that the walking is limited, but*  
15 *at least I could rest."* [Male, 80's, intervention group]  
16  
17  
18  
19

20 Most participants stated that the NMES device was feasible and acceptable:

21  
22  
23 *"The instructions were pretty straightforward, and once you have done it the first time,..., you just*  
24 *got it out of the bag and off you went."* [Male, 80's, intervention group]  
25  
26  
27  
28

29 However two participants reported negative NMES experiences:

30  
31  
32 *"It was a damn nuisance, to be perfectly frank,..., no, it was a bit of a performance and a bit of a*  
33 *nuisance."* [Female, 70's, intervention group]  
34  
35  
36  
37

38 *"It was as if it was a placebo in place of the real thing,..., yes, I would say that it was the placebo, it*  
39 *wasn't the real thing."* [Male, 70's, control group]  
40  
41  
42  
43

44 All participants reported that the exercise programme was feasible, acceptable and beneficial:

45  
46  
47 *"I'm still doing them, actually. It's a good programme"* [Female, 70's, intervention group]  
48  
49

50 However, maintaining motivation to complete the programme was difficult with one participant stating  
51 that he did so because it was part of the study:  
52  
53

54  
55  
56 *"I made sure I did the leg exercises [even when unwell] because that's what I promised I would do"*  
57  
58 [Male, 60's, intervention group]  
59  
60



1 There was disparity in participants' experience of the weekly telephone support during the six-week  
2 intervention period. Some found it burdensome and suggested that digital monitoring would have been  
3 preferable:  
4  
5

6  
7  
8 *"That [provision of electronic version of home exercise programme] would have better. Yes, that would*  
9 *have been brilliant, and to then send it [diary reporting compliance and progress] back that way too"*  
10  
11

12  
13 [Female, 70's, intervention group]  
14  
15

16 In contrast, other participants found it to be a positive experience and suggested more frequent  
17 monitoring would have been preferable:  
18  
19

20  
21  
22 *"I think once a week, or maybe twice a week would be a secondary call, if you did it on a Monday and then*  
23 *on a Friday"* [Male, 60's, intervention group]  
24  
25

26  
27  
28 In addition, some participants reported that diary completion was difficult which affected their compliance  
29 with this tool:  
30  
31

32  
33  
34 *"I didn't fill in the form right. I didn't find the form very easy. I did it my own way"* [Female, 70's,  
35  
36 intervention group]  
37  
38  
39  
40  
41  
42

## 43 DISCUSSION

44  
45

46 We aimed to determine the acceptability of NMES of the quadriceps muscles in people with IPF and  
47 identify whether a future definitive trial is feasible. The qualitative interviews suggest that participants  
48 found the trial process, active NMES device and home exercise programme acceptable, but there were  
49 concerns about the credibility of placebo NMES and divergent opinions regarding the telephone support  
50 and diary. The quantitative data demonstrates that a definitive trial using this protocol should not be  
51 undertaken because of challenges in participant recruitment as well as between-group differences in  
52 retention of, treatment adherence and blinding of participants in the control compared to the intervention  
53  
54  
55  
56  
57  
58  
59  
60

1 group. However, this feasibility study provided important additional information that could inform future  
2  
3 rehabilitation-based interventions.  
4  
5

#### 6 Primary feasibility outcomes 7 8

9 The principle reason this protocol in its current format should not be tested in a definitive trial is that an  
10  
11 insufficient number of participants were recruited to satisfy the a priori sample size requirement. A total  
12  
13 of 364 potential participants were screened with 211 excluded prior to the eligibility assessment. The main  
14  
15 reason for exclusion was the distance between the person's home and assessment centre, despite the  
16  
17 provision of transport. The Interstitial Lung Disease (ILD) Unit at our hospital provides specialist care to  
18  
19 people that live in a large geographic area, which may explain the reluctance to participate in the study.  
20  
21  
22 Although we have not faced such recruitment issues in other studies, our experience with this protocol  
23  
24 suggests future rehabilitation-based research should be multi-site and conducted alongside clinical  
25  
26 appointments and/or located in centres accessible to participants and/or in participants' homes. Out of  
27  
28 153 participants that attended the eligibility assessment, 23 consented to participate in the study. The  
29  
30 most common reason for failing this assessment was MRC<3 or PR completion within six months. These  
31  
32 conditions formed part of the inclusion criteria to ensure that people with advanced disease and a  
33  
34 sedentary lifestyle respectively were recruited to the study. Going forward, trial eligibility based on  
35  
36 indication for NMES rather than PR completion status may be more appropriate.  
37  
38  
39  
40  
41  
42  
43

44 There was a trend for a greater proportion of participants in the control group to withdraw from the study,  
45  
46 discontinue and perform less of the intervention, and/or become unblinded to group allocation. These  
47  
48 findings may be related to statistical chance because of the small sample size, differences in between-  
49  
50 group baseline characteristics and/or poor placebo NMES device credibility. The between-group difference  
51  
52 in baseline characteristics and concerns about placebo NMES credibility were unexpected findings, because  
53  
54 the minimisation criteria used in the randomisation process and the placebo device were informed by  
55  
56 previous studies.<sup>15</sup> Furthermore, although two different devices were used to deliver active and placebo  
57  
58  
59  
60

1 NMES, the outward appearance of both were identical and as such, should not have contributed to the  
2 differences in participant perception. However, qualitative findings demonstrated that a participant in the  
3 control group believed he used a placebo device as the sensation was insufficiently strong. Future  
4 research should consider reviewing the intensity and/or individualise the intensity of the placebo device.  
5  
6  
7  
8  
9

10 In contrast to the control group, qualitative findings demonstrated that active NMES was acceptable to  
11 participants in the intervention group. In addition, the home exercise programme was also acceptable to  
12 both groups. However, there was a difference of opinion regarding the frequency of the telephone support  
13 and utility of the NMES and exercise diary. Exploration of these aspects of the intervention are important  
14 for future home-based rehabilitation studies in IPF.  
15  
16  
17  
18  
19  
20  
21  
22

23 Although blinding of some participants was not maintained, assessor blinding was successful. This was  
24 achieved by provision of an office isolated from the research laboratory that allowed the unblinded  
25 researcher inform participants of group allocation, deliver the training session and schedule telephone  
26 calls.  
27  
28  
29  
30  
31  
32  
33

34 The majority of the outcome measures were acceptable to participants and feasible to perform. However,  
35 there were a significant volume of missing accelerometer data because participants declined to wear the  
36 device or there was insufficient data to analyse. Going forward, researchers may decide to make wearing  
37 the device a prerequisite to study entry, shorten the device-wearing time or consider an alternative device  
38 that is more acceptable to participants.  
39  
40  
41  
42  
43  
44  
45  
46

47 There was a difference in the amount of expected and related adverse events in the intervention  
48 compared to the control group. These events occurred during or following NMES use and did not result in  
49 discontinuation of the intervention. Although not categorised as serious, these findings reinforce the  
50 importance of explaining the risks associated with this type of intervention in the patient information  
51 sheet.  
52  
53  
54  
55  
56  
57  
58  
59  
60

## Secondary outcome measures

Although the intervention and control groups were balanced in terms of some outcome measures, there was imbalance in important variables that could influence exercise and physical activity capacity as a greater proportion of the control group were diagnosed with pulmonary hypertension and had a supplementary oxygen prescription as well as worse exercise capacity, activities of daily life performance, walking speed and physical activity levels. This may have arisen because of statistical chance given the small participant numbers, however, the minimisation variables used for randomisation may also have contributed to the problem. The minimisation variables: age, gender and quadriceps strength, were chosen as they were relevant to the population of interest and intervention, and were also informed by previous studies.<sup>15</sup> However, although there is a strong correlation between quadriceps strength and exercise capacity ( $r=0.56$ ,  $p<0.001$ ) in ILD,<sup>26</sup> accounting for exercise capacity itself, as well as co-morbidities and physical activity levels may be important in ensuring balance between trial groups in future research.

Owing to the small sample size, imbalance in between-group baseline characteristics and smaller number of control versus intervention group participants, it is challenging to identify an outcome measure that has the potential to be a primary or secondary outcome measure in a definitive trial. However, as there was a trend for greater reduction in sedentary time between baseline and six weeks as well as a greater increase in self-care ability and light intensity physical activity between baseline and 12 weeks that favoured the intervention group, these outcomes may be worth exploring. However, as previously discussed, there was a significant amount of missing accelerometer data.

## Strengths and limitations

There are several strengths to this research. It was performed in line with the CONSORT 2010 statement.<sup>13</sup> One of the inclusion criteria was a measure of quadriceps strength, which ensured NMES was indicated in the trial population. The intervention was based on patient and public involvement feedback and informed by published trials.<sup>15</sup> We used an accepted placebo intervention to maintain participant blinding with

1 outcomes assessed by a blinded assessor. We tested numerous relevant outcome measures that could be  
2 used in a definitive trial and undertook qualitative interviews that complemented the quantitative findings.  
3  
4 However, there were some limitations. The use of a single-centre in this trial likely contributed to under-  
5  
6 recruitment of participants and consequently, we conclude that the current protocol should not be used in  
7  
8 a definitive trial. This in turn led to insufficient recruitment of participants to the qualitative aspect of the  
9  
10 study, and as such data saturation of experiences and perceptions was not achieved. Accordingly, the  
11  
12 transferability of the qualitative findings may be limited.  
13  
14  
15  
16  
17

## 18 Conclusion

19  
20  
21 We conclude that a definitive clinical trial to investigate the efficacy of NMES of the quadriceps muscles in  
22  
23 advanced IPF using this protocol is not feasible. However, novel findings such as the frequency of  
24  
25 telephone support, exercise and NMES diary format and choice of support and monitoring platform e.g.  
26  
27 online versus telephone, could inform trials of future home rehabilitation interventions in this population.  
28  
29  
30  
31  
32  
33  
34  
35  
36  
37  
38  
39  
40  
41  
42  
43  
44  
45  
46  
47  
48  
49  
50  
51  
52  
53  
54  
55  
56  
57  
58  
59  
60

1 **Author contributions:** Concept and Design of Study: CMN, MM, WM; Acquisition of Data: CMN, OP, SP,  
2 REB, JAW; Analysis of Data: CMN, REB, WM; Drafting of Manuscript: CMN, REB, WM; Revision of  
3 manuscript critically for important intellectual content: All authors; Approval of final manuscript: All  
4 authors  
5  
6  
7  
8  
9

10  
11  
12 **Competing interest statement:**  
13

- 14 • CMN reports receiving fees from Novartis, outside of this work
- 15 • SP, REB, JAW, OP, MM report no competing interests
- 16 • PMG reports fees, honoraria and grants from Roche Pharmaceuticals, Boehringer Ingelheim, Cipla  
17 and Brainomix.
- 18 • EAR reports lecture and/or advisory board fees and/or grants from Roche Pharmaceuticals and  
19 Boehringer Ingelheim.
- 20 • AUW reports speaking and consultancy fees from Roche and Boehringer Ingelheim.
- 21 • PLM reports receiving fees from AstraZeneca, Boehringer Ingelheim and Hoffman-La Roche, outside  
22 the submitted work.
- 23 • VK reports fees from Roche outside of the submitted work.
- 24 • FC reports fees from Boehringer-Ingelheim and Roche outside of the submitted work.
- 25 • TMM has, via his institution, received industry-academic funding from Astra Zeneca and  
26 GlaxoSmithKline R&D and has received consultancy or speakers fees from Astra Zeneca, Bayer,  
27 Blade Therapeutics, Boehringer Ingelheim, Bristol-Myers Squibb, Galapagos, Galecto,  
28 GlaxoSmithKline R&D, Indalo, IQVIA, Pliant, Respivant, Roche and Theravance.
- 29 • WDCM reports personal fees from Jazz Pharmaceuticals, personal fees from Mundipharma,  
30 personal fees from Novartis, grants from Pfizer, non-financial support from GSK, grants from  
31 National Institute for Health Research, grants from British Lung Foundation, outside the submitted  
32 work.  
33  
34  
35  
36  
37  
38  
39  
40  
41  
42  
43  
44  
45  
46  
47  
48  
49  
50  
51  
52  
53  
54  
55  
56  
57  
58  
59  
60

1  
2  
3  
4  
5  
6  
7  
8  
9  
10  
11  
12  
13  
14  
15  
16  
17  
18  
19  
20  
21  
22  
23  
24  
25  
26  
27  
28  
29  
30  
31  
32  
33  
34  
35  
36  
37  
38  
39  
40  
41  
42  
43  
44  
45  
46  
47  
48  
49  
50  
51  
52  
53  
54  
55  
56  
57  
58  
59  
60

**Funding statement:** This work was supported by a British Lung Foundation IPF Project Grant (grant number IPF/PG/17-15).

**Data sharing statement:** We did not obtain participant consent to share data.

For peer review only

1  
2  
3  
4  
5  
6  
7  
8  
9  
10  
11  
12  
13  
14  
15  
16  
17  
18  
19  
20  
21  
22  
23  
24  
25  
26  
27  
28  
29  
30  
31  
32  
33  
34  
35  
36  
37  
38  
39  
40  
41  
42  
43  
44  
45  
46  
47  
48  
49  
50  
51  
52  
53  
54  
55  
56  
57  
58  
59  
60  
**REFERENCES**

1. Fell CD. Idiopathic pulmonary fibrosis: phenotypes and comorbidities. *Clinics in Chest Medicine* 2012;33(1):51-57.
2. Holland AE, Fiore JF, Bell EC, et al. Dyspnoea and comorbidity contribute to anxiety and depression in interstitial lung disease. *Respirology* 2014;19(8):1215-21.
3. Nishiyama O, Taniguchi H, Kondoh Y, et al. Quadriceps weakness is related to exercise capacity in idiopathic pulmonary fibrosis. *Chest* 2005;127(6):2028-33.
4. Mendes P, Wickerson L, Helm D, et al. Skeletal muscle atrophy in advanced interstitial lung disease. *Respirology* 2015;20(6):953-59.
5. Mendoza L, Gogali A, Shrikrishna D, et al. Quadriceps strength and endurance in fibrotic idiopathic interstitial pneumonia. *Respirology* 2014;19(1):138-43.
6. NICE. Idiopathic pulmonary fibrosis: The diagnosis and management of suspected idiopathic pulmonary fibrosis 2013 [Available from: <https://www.nice.org.uk/guidance/cg163/chapter/introduction> accessed 10th January 2019.
7. Dowman L, Hill CJ, Holland AE. Pulmonary rehabilitation for interstitial lung disease. *Cochrane Database of Systematic Reviews* 2014(10)
8. Nishiyama O, Kondoh Y, Kimura T, et al. Effects of pulmonary rehabilitation in patients with idiopathic pulmonary fibrosis. *Respirology* 2008;13(3):394-99.
9. Vainshelboim B, Oliveira J, Yehoshua L, et al. Exercise training-based pulmonary rehabilitation program is clinically beneficial for idiopathic pulmonary fibrosis. *Respiration* 2014;88(5):378-88.
10. Holland AE, Hill CJ, Conron M, et al. Short term improvement in exercise capacity and symptoms following exercise training in interstitial lung disease. *Thorax* 2008;63(6):549-54.



- 1 11. NICE. Electrical stimulation to improve muscle strength in chronic respiratory conditions, chronic heart  
2 failure and chronic kidney disease 2020 [Available from: <https://www.nice.org.uk/guidance/ipg677>  
3 accessed 16th December 2020.  
4  
5  
6
- 7 12. Jones S, Man WDC, Gao W, et al. Neuromuscular electrical stimulation for muscle weakness in adults  
8 with advanced disease. *Cochrane Database of Systematic Reviews* 2016(10)  
9
- 10 13. Eldridge SM, Chan CL, Campbell MJ, et al. CONSORT 2010 statement: extension to randomised pilot and  
11 feasibility trials. *bmj* 2016;355:i5239.  
12  
13
- 14 14. Raghu G, Collard HR, Egan JJ, et al. An official ATS/ERS/JRS/ALAT statement: idiopathic pulmonary  
15 fibrosis: evidence-based guidelines for diagnosis and management. *Am J Respir Crit Care Med*  
16 2011;183(6):788-824. doi: 10.1164/rccm.2009-040GL  
17  
18
- 19 15. Maddocks M, Nolan CM, Man WD, et al. Neuromuscular electrical stimulation to improve exercise  
20 capacity in patients with severe COPD: a randomised double-blind, placebo-controlled trial. *The*  
21 *Lancet Respiratory Medicine* 2016;4(1):27-36.  
22  
23
- 24 16. Holland AE, Spruit MA, Troosters T, et al. An official European Respiratory Society/American Thoracic  
25 Society technical standard: field walking tests in chronic respiratory disease. *European Respiratory*  
26 *Journal* 2014;44(6):1428-46.  
27  
28
- 29 17. Patel MS, Mohan D, Andersson YM, et al. Phenotypic characteristics associated with reduced short  
30 physical performance battery score in COPD. *Chest* 2014;145(5):1016-24.  
31  
32
- 33 18. Nolan CM, Maddocks M, Maher TM, et al. Phenotypic characteristics associated with slow gait speed in  
34 idiopathic pulmonary fibrosis. *Respirology* 2018;23(5):498-506.  
35  
36
- 37 19. Canavan JL, Maddocks M, Nolan CM, et al. Functionally relevant cut point for isometric quadriceps  
38 muscle strength in chronic respiratory disease. *American journal of respiratory and critical care*  
39 *medicine* 2015;192(3):395-97.  
40  
41  
42  
43  
44  
45  
46  
47  
48  
49  
50  
51  
52  
53  
54  
55  
56  
57  
58  
59  
60

- 1  
2  
3  
4  
5  
6  
7  
8  
9  
10  
11  
12  
13  
14  
15  
16  
17  
18  
19  
20  
21  
22  
23  
24  
25  
26  
27  
28  
29  
30  
31  
32  
33  
34  
35  
36  
37  
38  
39  
40  
41  
42  
43  
44  
45  
46  
47  
48  
49  
50  
51  
52  
53  
54  
55  
56  
57  
58  
59  
60
20. Nolan CM, Birring SS, Maddocks M, et al. King's Brief Interstitial Lung Disease questionnaire: responsiveness and minimum clinically important difference. *European Respiratory Journal* 2019;54(3)
21. Garrod R, Bestall J, Paul E, et al. Development and validation of a standardized measure of activity of daily living in patients with severe COPD: the London Chest Activity of Daily Living scale (LCADL). *Respiratory medicine* 2000;94(6):589-96.
22. Nolan CM, Maddocks M, Canavan JL, et al. Pedometer Step Count Targets during Pulmonary Rehabilitation in Chronic Obstructive Pulmonary Disease. A Randomized Controlled Trial. *American journal of respiratory and critical care medicine* 2017;195(10):1344-52.
23. Malterud K, Siersma VD, Guassora AD. Sample Size in Qualitative Interview Studies: Guided by Information Power. *Qualitative health research* 2016;26(13):1753-60. doi: 10.1177/1049732315617444 [published Online First: 2015/11/29]
24. Gale NK, Heath G, Cameron E, et al. Using the framework method for the analysis of qualitative data in multi-disciplinary health research. *BMC medical research methodology* 2013;13(1):1-8.
25. O'Cathain A, Murphy E, Nicholl J. Three techniques for integrating data in mixed methods studies. *Bmj* 2010;341
26. Watanabe F, Taniguchi H, Sakamoto K, et al. Quadriceps weakness contributes to exercise capacity in nonspecific interstitial pneumonia. *Respiratory medicine* 2013;107(4):622-28.

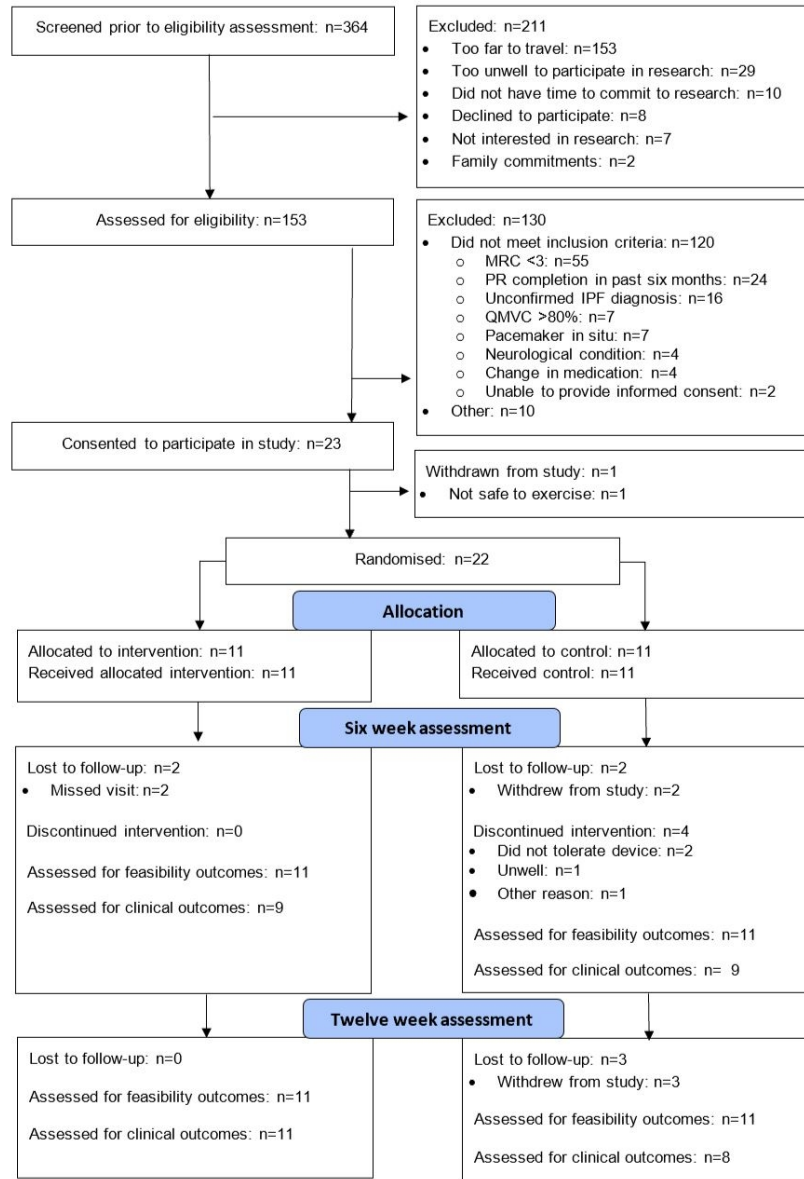

Figure 1. CONSORT diagram

Abbreviations: IPF: Idiopathic Pulmonary Fibrosis; MRC: Medical Research Council; PR: Pulmonary Rehabilitation; QMVC: Quadriceps Maximum Voluntary Contraction

116x170mm (192 x 192 DPI)

1  
2  
3 **Muscle stimulation in advanced idiopathic pulmonary fibrosis: a randomised placebo-controlled**  
4  
5  
6 **feasibility study**

7  
8  
9 **Online supplement**

10  
11  
12  
13  
14 **MATERIALS AND METHODS**

15  
16  
17 **Interventions**

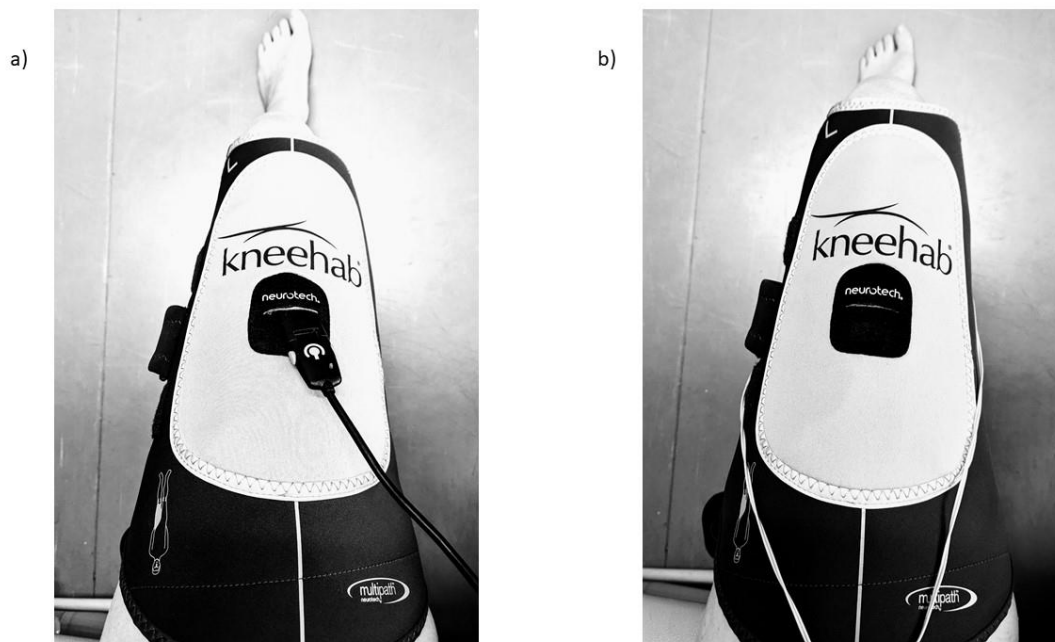

23  
24  
25  
26  
27  
28  
29  
30  
31  
32  
33  
34  
35  
36  
37  
38  
39  
40  
41  
42  
43 **Figure 1: Image of the a) active and b) placebo NMES device**

44  
45  
46 *Abbreviations: NMES: Neuromuscular Electrical Stimulation*

1  
2  
3 *Home exercise programme:*  
4  
5

6 Participants in both groups were provided with an individualised home exercise programme  
7  
8 supplemented with a manual in which they were instructed to perform exercises at least three  
9  
10 times per week. The programme included prescribed aerobic and resistance exercises specific to  
11  
12 each participant. For aerobic exercise e.g. walking, participants were prescribed an exercise  
13  
14 intensity of Borg CR10 Dyspnoea score 3 to 4<sup>1</sup> and distance was progressed to a maximum of 30  
15  
16 minutes. Upper and lower limb resistance exercise was prescribed and progressed in line with the  
17  
18 American College of Sports Medicine guidelines.<sup>2</sup> Participants were provided with a simple diary to  
19  
20 record home exercise performance. Over the six-week intervention period, the unblinded  
21  
22 researcher telephoned participants weekly to review performance and progress home exercises.  
23  
24 To progress the exercise programme, participants were asked to increase the intensity or duration  
25  
26 of aerobic exercise or the intensity or volume of resistance training.  
27  
28  
29  
30  
31  
32  
33  
34  
35  
36  
37  
38  
39  
40  
41  
42  
43  
44  
45  
46  
47  
48  
49  
50  
51  
52  
53  
54  
55  
56  
57  
58  
59  
60

## RESULTS

Table S1. Missing data in clinical outcomes

| Outcome                            | All | Intervention group | Control group |
|------------------------------------|-----|--------------------|---------------|
| 6MWT baseline                      | 0   | 0                  | 0             |
| 6MWT 6 weeks                       | 5   | 2                  | 3             |
| 6MWT 12 weeks                      | 6   | 1                  | 5             |
| SPPB baseline                      | 0   | 0                  | 0             |
| SPPB 6 weeks                       | 5   | 3                  | 2             |
| SPPB 12 weeks                      | 5   | 1                  | 4             |
| Four metre gait speed baseline     | 0   | 0                  | 0             |
| Four metre gait speed 6 weeks      | 5   | 3                  | 2             |
| Four metre gait speed 12 weeks     | 5   | 1                  | 4             |
| QMVC baseline                      | 0   | 0                  | 0             |
| QMVC 6 weeks                       | 5   | 2                  | 3             |
| QMVC 12 weeks                      | 4   | 0                  | 4             |
| Rectus femoris CSA baseline        | 0   | 0                  | 0             |
| Rectus femoris CSA 6 weeks         | 5   | 2                  | 3             |
| Rectus femoris CSA 12 weeks        | 4   | 0                  | 4             |
| KBILD (domains and total) baseline | 0   | 0                  | 0             |
| KBILD (domains and total) 6 weeks  | 4   | 2                  | 2             |
| KBILD (domains and total) 12 weeks | 3   | 0                  | 3             |
| EQ5D5L (domains) 12 weeks          | 3   | 0                  | 3             |
| LCADL (domains and total) baseline | 0   | 0                  | 0             |
| LCADL (domains and total) 6 weeks  | 4   | 2                  | 2             |
| LCADL (domains and total) 12 weeks | 3   | 0                  | 3             |
| Physical activity data baseline    | 8   | 4                  | 4             |
| Physical activity data 6 weeks     | 11  | 5                  | 6             |
| Physical activity data 12 weeks    | 11  | 5                  | 6             |

1  
2  
3 Data presented as number.  
4

5 *Abbreviations: 6MWT: Six Minute Walk Test; CI: Confidence Interval; EQ5D5L: EQ5D 5-Levels;*  
6 *KBILD: King's Brief Interstitial Lung Disease questionnaire; LCADL: London Chest Activities of Daily*  
7 *Living questionnaire; QMVC: Quadriceps Maximum Voluntary Contraction; SPPB: Short Physical*  
8 *Performance Battery.*  
9  
10  
11  
12  
13  
14  
15  
16

## 17 REFERENCES

- 18 1. Borg G. Borg's perceived exertion and pain scales: Human kinetics 1998.
- 19 2. Kraemer W, Adams K, Cafarelli E, et al. American College. of Sports Medicine. American College  
20  
21  
22  
23 of Sports Medicine position stand. Progression models in resistance training for healthy  
24  
25  
26  
27  
28 adults. *Med Sci Sports Exerc* 2002;34(2):364-80.  
29  
30  
31  
32  
33  
34  
35  
36  
37  
38  
39  
40  
41  
42  
43  
44  
45  
46  
47  
48  
49  
50  
51  
52  
53  
54  
55  
56  
57  
58  
59  
60

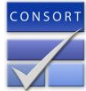

## CONSORT 2010 checklist of information to include when reporting a pilot or feasibility trial\*

| Section/Topic                    | Item No | Checklist item                                                                                                                                                                              | Reported on page No |
|----------------------------------|---------|---------------------------------------------------------------------------------------------------------------------------------------------------------------------------------------------|---------------------|
| <b>Title and abstract</b>        |         |                                                                                                                                                                                             |                     |
|                                  | 1a      | Identification as a pilot or feasibility randomised trial in the title                                                                                                                      | 1                   |
|                                  | 1b      | Structured summary of pilot trial design, methods, results, and conclusions (for specific guidance see CONSORT abstract extension for pilot trials)                                         | 4, 5                |
| <b>Introduction</b>              |         |                                                                                                                                                                                             |                     |
| Background and objectives        | 2a      | Scientific background and explanation of rationale for future definitive trial, and reasons for randomised pilot trial                                                                      | 6, 7                |
|                                  | 2b      | Specific objectives or research questions for pilot trial                                                                                                                                   | 7                   |
| <b>Methods</b>                   |         |                                                                                                                                                                                             |                     |
| Trial design                     | 3a      | Description of pilot trial design (such as parallel, factorial) including allocation ratio                                                                                                  | 7, 8                |
|                                  | 3b      | Important changes to methods after pilot trial commencement (such as eligibility criteria), with reasons                                                                                    | NA                  |
| Participants                     | 4a      | Eligibility criteria for participants                                                                                                                                                       | 7                   |
|                                  | 4b      | Settings and locations where the data were collected                                                                                                                                        | 7                   |
|                                  | 4c      | How participants were identified and consented                                                                                                                                              | 7, 8                |
| Interventions                    | 5       | The interventions for each group with sufficient details to allow replication, including how and when they were actually administered                                                       | 8, 9                |
| Outcomes                         | 6a      | Completely defined prespecified assessments or measurements to address each pilot trial objective specified in 2b, including how and when they were assessed                                | 9, 10               |
|                                  | 6b      | Any changes to pilot trial assessments or measurements after the pilot trial commenced, with reasons                                                                                        | NA                  |
|                                  | 6c      | If applicable, prespecified criteria used to judge whether, or how, to proceed with future definitive trial                                                                                 | NA                  |
| Sample size                      | 7a      | Rationale for numbers in the pilot trial                                                                                                                                                    | 10                  |
|                                  | 7b      | When applicable, explanation of any interim analyses and stopping guidelines                                                                                                                | NA                  |
| Randomisation:                   |         |                                                                                                                                                                                             |                     |
| Sequence generation              | 8a      | Method used to generate the random allocation sequence                                                                                                                                      | 7, 8                |
|                                  | 8b      | Type of randomisation(s); details of any restriction (such as blocking and block size)                                                                                                      | 7, 8                |
| Allocation concealment mechanism | 9       | Mechanism used to implement the random allocation sequence (such as sequentially numbered containers), describing any steps taken to conceal the sequence until interventions were assigned | 7, 8                |



|                                                      |     |                                                                                                                                                                                       |           |
|------------------------------------------------------|-----|---------------------------------------------------------------------------------------------------------------------------------------------------------------------------------------|-----------|
| Implementation                                       | 10  | Who generated the random allocation sequence, who enrolled participants, and who assigned participants to interventions                                                               | 7, 8      |
| Blinding                                             | 11a | If done, who was blinded after assignment to interventions (for example, participants, care providers, those assessing outcomes) and how                                              | 8, 9      |
|                                                      | 11b | If relevant, description of the similarity of interventions                                                                                                                           | NA        |
| Statistical methods                                  | 12  | Methods used to address each pilot trial objective whether qualitative or quantitative                                                                                                | 10, 11    |
| <b>Results</b>                                       |     |                                                                                                                                                                                       |           |
| Participant flow (a diagram is strongly recommended) | 13a | For each group, the numbers of participants who were approached and/or assessed for eligibility, randomly assigned, received intended treatment, and were assessed for each objective | 11        |
|                                                      | 13b | For each group, losses and exclusions after randomisation, together with reasons                                                                                                      | 11, 12    |
| Recruitment                                          | 14a | Dates defining the periods of recruitment and follow-up                                                                                                                               | 7         |
|                                                      | 14b | Why the pilot trial ended or was stopped                                                                                                                                              | NA        |
| Baseline data                                        | 15  | A table showing baseline demographic and clinical characteristics for each group                                                                                                      | 14, 15    |
| Numbers analysed                                     | 16  | For each objective, number of participants (denominator) included in each analysis. If relevant, these numbers should be by randomised group                                          | 12, 14-19 |
| Outcomes and estimation                              | 17  | For each objective, results including expressions of uncertainty (such as 95% confidence interval) for any estimates. If relevant, these results should be by randomised group        | 12, 14-19 |
| Ancillary analyses                                   | 18  | Results of any other analyses performed that could be used to inform the future definitive trial                                                                                      | 20, 21    |
| Harms                                                | 19  | All important harms or unintended effects in each group (for specific guidance see CONSORT for harms)                                                                                 | 13        |
|                                                      | 19a | If relevant, other important unintended consequences                                                                                                                                  | NA        |
| <b>Discussion</b>                                    |     |                                                                                                                                                                                       |           |
| Limitations                                          | 20  | Pilot trial limitations, addressing sources of potential bias and remaining uncertainty about feasibility                                                                             | 25        |
| Generalisability                                     | 21  | Generalisability (applicability) of pilot trial methods and findings to future definitive trial and other studies                                                                     | 21-25     |
| Interpretation                                       | 22  | Interpretation consistent with pilot trial objectives and findings, balancing potential benefits and harms, and considering other relevant evidence                                   | 21-25     |
|                                                      | 22a | Implications for progression from pilot to future definitive trial, including any proposed amendments                                                                                 | 22-25     |
| <b>Other information</b>                             |     |                                                                                                                                                                                       |           |
| Registration                                         | 23  | Registration number for pilot trial and name of trial registry                                                                                                                        | 5, 7      |
| Protocol                                             | 24  | Where the pilot trial protocol can be accessed, if available                                                                                                                          | NA        |
| Funding                                              | 25  | Sources of funding and other support (such as supply of drugs), role of funders                                                                                                       | 2, 3      |
|                                                      | 26  | Ethical approval or approval by research review committee, confirmed with reference number                                                                                            | 7         |

1 Citation: Eldridge SM, Chan CL, Campbell MJ, Bond CM, Hopewell S, Thabane L, et al. CONSORT 2010 statement: extension to randomised pilot and feasibility trials. BMJ. 2016;355.

2 \*We strongly recommend reading this statement in conjunction with the CONSORT 2010, extension to randomised pilot and feasibility trials, Explanation and Elaboration for important  
3 clarifications on all the items. If relevant, we also recommend reading CONSORT extensions for cluster randomised trials, non-inferiority and equivalence trials, non-pharmacological  
4 treatments, herbal interventions, and pragmatic trials. Additional extensions are forthcoming: for those and for up to date references relevant to this checklist, see [www.consort-statement.org](http://www.consort-statement.org).  
5  
6  
7  
8  
9  
10  
11  
12  
13  
14  
15  
16  
17  
18  
19  
20  
21  
22  
23  
24  
25  
26  
27  
28  
29  
30  
31  
32  
33  
34  
35  
36  
37  
38  
39  
40  
41  
42

For peer review only

# BMJ Open

## Muscle stimulation in advanced idiopathic pulmonary fibrosis: a randomised placebo-controlled feasibility study

|                                 |                                                                                                                                                                                                                                                                                                                                                                                                                                                                                                                                                                                                                                                                                                                                                                                                                                                                                                                                                                                                                                                                                                                                                                                                                                                                                                                                                                                                                                                                                                                                                                                                                                                                                                                                                                                                                                                                                                                                                                                                                                                                                                                                      |
|---------------------------------|--------------------------------------------------------------------------------------------------------------------------------------------------------------------------------------------------------------------------------------------------------------------------------------------------------------------------------------------------------------------------------------------------------------------------------------------------------------------------------------------------------------------------------------------------------------------------------------------------------------------------------------------------------------------------------------------------------------------------------------------------------------------------------------------------------------------------------------------------------------------------------------------------------------------------------------------------------------------------------------------------------------------------------------------------------------------------------------------------------------------------------------------------------------------------------------------------------------------------------------------------------------------------------------------------------------------------------------------------------------------------------------------------------------------------------------------------------------------------------------------------------------------------------------------------------------------------------------------------------------------------------------------------------------------------------------------------------------------------------------------------------------------------------------------------------------------------------------------------------------------------------------------------------------------------------------------------------------------------------------------------------------------------------------------------------------------------------------------------------------------------------------|
| Journal:                        | <i>BMJ Open</i>                                                                                                                                                                                                                                                                                                                                                                                                                                                                                                                                                                                                                                                                                                                                                                                                                                                                                                                                                                                                                                                                                                                                                                                                                                                                                                                                                                                                                                                                                                                                                                                                                                                                                                                                                                                                                                                                                                                                                                                                                                                                                                                      |
| Manuscript ID                   | bmjopen-2021-048808.R1                                                                                                                                                                                                                                                                                                                                                                                                                                                                                                                                                                                                                                                                                                                                                                                                                                                                                                                                                                                                                                                                                                                                                                                                                                                                                                                                                                                                                                                                                                                                                                                                                                                                                                                                                                                                                                                                                                                                                                                                                                                                                                               |
| Article Type:                   | Original research                                                                                                                                                                                                                                                                                                                                                                                                                                                                                                                                                                                                                                                                                                                                                                                                                                                                                                                                                                                                                                                                                                                                                                                                                                                                                                                                                                                                                                                                                                                                                                                                                                                                                                                                                                                                                                                                                                                                                                                                                                                                                                                    |
| Date Submitted by the Author:   | 25-Apr-2021                                                                                                                                                                                                                                                                                                                                                                                                                                                                                                                                                                                                                                                                                                                                                                                                                                                                                                                                                                                                                                                                                                                                                                                                                                                                                                                                                                                                                                                                                                                                                                                                                                                                                                                                                                                                                                                                                                                                                                                                                                                                                                                          |
| Complete List of Authors:       | <p>Nolan, Claire; Guy's and St Thomas' Hospitals NHS Trust, Harefield Respiratory Research Group; Imperial College London, National Heart and Lung Institute</p> <p>Patel, Suhani; Guy's and St Thomas' Hospitals NHS Trust, Harefield Respiratory Research Group; Imperial College London, National Heart and Lung Institute</p> <p>Barker, Ruth; Guy's and St Thomas' NHS Foundation Trust, Harefield Respiratory Research Group; Imperial College London, National Heart and Lung Institute</p> <p>Walsh, Jessica; Guy's and St Thomas' NHS Foundation Trust, Harefield Respiratory Research Group</p> <p>Polgar, Oliver; Guy's and St Thomas' Hospitals NHS Trust, Harefield Respiratory Research Group</p> <p>Maddocks, Matthew; King's College London, Cicely Saunders Institute of Palliative Care, Policy &amp; Rehabilitation</p> <p>George, Peter M; Guy's and St Thomas' NHS Foundation Trust, Interstitial Lung Disease Unit; Imperial College London, National Heart and Lung Institute</p> <p>Renzoni, Elisabetta A.; Guy's and St Thomas' NHS Foundation Trust, Interstitial Lung Disease Unit; Imperial College London, National Heart and Lung Institute</p> <p>Wells, Athol; Guy's and St Thomas' NHS Foundation Trust, Interstitial Lung Disease Unit; Imperial College London, National Heart and Lung Institute</p> <p>Molyneaux, Philip; Guy's and St Thomas' NHS Foundation Trust, Interstitial Lung Disease Unit; Imperial College London, National Heart and Lung Institute</p> <p>Kouranos, Vasilis; Guy's and St Thomas' NHS Foundation Trust, Interstitial Lung Disease Unit; Imperial College London, National Heart and Lung Institute</p> <p>Chua, Felix; Guy's and St Thomas' NHS Foundation Trust, Interstitial Lung Disease Unit; Imperial College London, National Heart and Lung Institute</p> <p>Maher, Toby; Imperial College London, National Heart and Lung Institute; University of Southern California, Keck Medicine</p> <p>Man, William; Guy's and St Thomas' NHS Foundation Trust, Harefield Respiratory Research Group; Imperial College London, National Heart and Lung Institute</p> |
| <b>Primary Subject Heading</b>: | Rehabilitation medicine                                                                                                                                                                                                                                                                                                                                                                                                                                                                                                                                                                                                                                                                                                                                                                                                                                                                                                                                                                                                                                                                                                                                                                                                                                                                                                                                                                                                                                                                                                                                                                                                                                                                                                                                                                                                                                                                                                                                                                                                                                                                                                              |

1  
2  
3  
4  
5  
6  
7  
8  
9  
10  
11  
12  
13  
14  
15  
16  
17  
18  
19  
20  
21  
22  
23  
24  
25  
26  
27  
28  
29  
30  
31  
32  
33  
34  
35  
36  
37  
38  
39  
40  
41  
42  
43  
44  
45  
46  
47  
48  
49  
50  
51  
52  
53  
54  
55  
56  
57  
58  
59  
60

|                            |                                                                                                                      |
|----------------------------|----------------------------------------------------------------------------------------------------------------------|
| Secondary Subject Heading: | Rehabilitation medicine, Respiratory medicine, Qualitative research                                                  |
| Keywords:                  | Interstitial lung disease < THORACIC MEDICINE, REHABILITATION MEDICINE, RESPIRATORY MEDICINE (see Thoracic Medicine) |
|                            |                                                                                                                      |

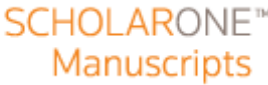

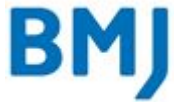

I, the Submitting Author has the right to grant and does grant on behalf of all authors of the Work (as defined in the below author licence), an exclusive licence and/or a non-exclusive licence for contributions from authors who are: i) UK Crown employees; ii) where BMJ has agreed a CC-BY licence shall apply, and/or iii) in accordance with the terms applicable for US Federal Government officers or employees acting as part of their official duties; on a worldwide, perpetual, irrevocable, royalty-free basis to BMJ Publishing Group Ltd ("BMJ") its licensees and where the relevant Journal is co-owned by BMJ to the co-owners of the Journal, to publish the Work in this journal and any other BMJ products and to exploit all rights, as set out in our [licence](#).

The Submitting Author accepts and understands that any supply made under these terms is made by BMJ to the Submitting Author unless you are acting as an employee on behalf of your employer or a postgraduate student of an affiliated institution which is paying any applicable article publishing charge ("APC") for Open Access articles. Where the Submitting Author wishes to make the Work available on an Open Access basis (and intends to pay the relevant APC), the terms of reuse of such Open Access shall be governed by a Creative Commons licence – details of these licences and which [Creative Commons](#) licence will apply to this Work are set out in our licence referred to above.

Other than as permitted in any relevant BMJ Author's Self Archiving Policies, I confirm this Work has not been accepted for publication elsewhere, is not being considered for publication elsewhere and does not duplicate material already published. I confirm all authors consent to publication of this Work and authorise the granting of this licence.

**Muscle stimulation in advanced idiopathic pulmonary fibrosis: a randomised placebo-controlled  
feasibility study**

|    |                                          |                            |
|----|------------------------------------------|----------------------------|
| 6  | Dr Claire M. Nolan PhD <sup>1,2</sup>    | c.nolan@rbht.nhs.uk        |
| 8  | Ms. Suhani Patel MSc <sup>1,2</sup>      | s.patel1@rbht.nhs.uk       |
| 11 | Ms Ruth E. Barker MSc <sup>1,2</sup>     | r.barker2@rbht.nhs.uk      |
| 13 | Ms Jessica Walsh <sup>1</sup>            | j.walsh@rbht.nhs.uk        |
| 16 | Mr Oliver Polgar MSc <sup>1</sup>        | o.polgar@rbht.nhs.uk       |
| 18 | Dr Matthew Maddocks PhD <sup>3</sup>     | matthew.maddocks@kcl.ac.uk |
| 21 | Dr Peter M George PhD <sup>2,4</sup>     | p.george@rbht.nhs.uk       |
| 23 | Dr Elisabetta A Renzoni <sup>2,4</sup>   | e.renzoni@rbht.nhs.uk      |
| 25 | Prof Athol U Wells <sup>2,4</sup>        | a.wells@rbht.nhs.uk        |
| 28 | Dr Philip L Molyneaux PhD <sup>2,4</sup> | p.molyneux@rbht.nhs.uk     |
| 30 | Dr Vasilis Kouranos PhD <sup>2,4</sup>   | v.kouranos@rbht.nhs.uk     |
| 33 | Dr Felix Chua PhD <sup>2,4</sup>         | f.chua@rbht.nhs.uk         |
| 35 | Professor Toby M Maher <sup>2,4,5</sup>  | toby.maher@usc.edu         |
| 37 | Dr William D-C. Man PhD <sup>1,2,6</sup> | w.man@rbht.nhs.uk          |

**Affiliations:**

1. Harefield Respiratory Research Group, Royal Brompton and Harefield Clinical Group, Guy's and St Thomas' NHS Foundation Trust, UK
2. National Heart and Lung Institute, Imperial College London, UK
3. King's College London, Cicely Saunders Institute of Palliative Care, Policy & Rehabilitation, UK
4. Interstitial Lung Disease Unit, Royal Brompton and Harefield Clinical Group, Guy's and St Thomas' NHS Foundation Trust, UK
5. Keck Medicine, University of Southern California, USA

1 6. Harefield Pulmonary Rehabilitation Unit, Royal Brompton and Harefield Clinical Group, Guy's and St  
2  
3 Thomas' NHS Foundation Trust, UK  
4  
5  
6  
7

8 **Corresponding author:** Dr Claire Nolan, Senior Research Physiotherapist, Royal Brompton and Harefield  
9  
10 Clinical Group, Guy's and St Thomas' NHS Foundation Trust, Harefield Hospital, Middlesex, UB9 6JH, United  
11  
12 Kingdom, Tel: +44 (0)1895 828851, Email: c.nolan@rbht.nhs.uk  
13  
14  
15  
16  
17  
18

19 **Word count:**

- 20
- 21 • Body: 4104
- 22
- 23
- 24
- 25

26 **Figures and tables:**

- 27
- 28
- 29 • Number of figures: 1
- 30
- 31 • Number of tables: 4
- 32
- 33
- 34
- 35
- 36
- 37
- 38
- 39
- 40
- 41
- 42
- 43
- 44
- 45
- 46
- 47
- 48
- 49
- 50
- 51
- 52
- 53
- 54
- 55
- 56
- 57
- 58
- 59
- 60

**ABSTRACT**

Objectives: To assess the acceptability of neuromuscular electrical stimulation (NMES) of the quadriceps muscles in people with idiopathic pulmonary fibrosis (IPF) and to identify whether a future definitive trial is feasible.

Design: A randomised, parallel, two-group, participant- and assessor-blinded, placebo-controlled feasibility trial with embedded qualitative interviews.

Setting: Outpatient department, Royal Brompton and Harefield Hospitals.

Participants: Twenty-two people with IPF: median (25<sup>th</sup>, 75<sup>th</sup> centile) age 76 (74, 82) years, forced vital capacity 62 (50, 75) %predicted, six-minute walk test distance 289 (149, 360) metres.

Interventions: Usual care (home-based exercise, weekly telephone support, breathlessness management leaflet) with either placebo or active NMES for six weeks, with follow up at six- and 12-weeks.

Primary outcome measures: Feasibility of recruitment and retention, treatment uptake and adherence, outcome assessments, participant and outcome assessor blinding and adverse events related to interventions.

Secondary outcome measures: Outcome measures with potential to be primary or secondary outcomes in a definitive clinical trial. In addition, purposively sampled participants were interviewed to capture their experiences and acceptability of the trial.

Results: Out of 364 people screened, 23 were recruited: 11 were allocated to each group and one was withdrawn prior to randomisation. Compared to the control group, a greater proportion of the intervention group completed the intervention, remained in the trial blinded to group allocation and experienced intervention-related adverse events. Assessor-blinding was maintained. The secondary outcome measures were feasible with most missing data associated with the accelerometer. Small participant numbers precluded identification of an outcome measure suitable for a definitive trial.



1 Qualitative findings demonstrated that trial process and active NMES were acceptable but there were  
2 concerns about the credibility of placebo NMES.  
3

4  
5  
6 Conclusions: Primarily owing to recruitment difficulties, a definitive trial using the current protocol to  
7  
8 evaluate NMES in people with IPF is not feasible.  
9

10  
11  
12 Trial registration: [clinicaltrials.gov NCT03499275](https://clinicaltrials.gov/ct2/show/study/NCT03499275)  
13  
14  
15  
16  
17

## 18 **Article Summary**

- 21 1. This is the first study to examine the feasibility of neuromuscular electrical stimulation in people  
22 with idiopathic pulmonary fibrosis.  
23
- 24 2. The intervention was developed using a combination of patient and public involvement feedback  
25 and previously published studies.  
26
- 27 3. We blinded the outcome assessor to group allocation and used an existing placebo neuromuscular  
28 electrical stimulator device to blind participants in the control group.  
29
- 30 4. We conducted qualitative interviews to capture participant experiences.  
31
- 32 5. The study took place at a single site may have been a limiting factor for participant recruitment.  
33  
34  
35  
36  
37  
38  
39  
40  
41  
42  
43  
44  
45  
46  
47  
48  
49  
50  
51  
52  
53  
54  
55  
56  
57  
58  
59  
60

## INTRODUCTION

Idiopathic pulmonary fibrosis (IPF) is characterised by progressive dyspnoea, reduction in functional capacity and subsequent loss of independence.<sup>1,2</sup> Several factors contribute to this, including declining lung function and peripheral muscle weakness.<sup>3</sup> There is growing interest in the latter, as it is known that people with IPF have smaller rectus femoris cross-sectional area<sup>4</sup> as well as reduced quadriceps strength<sup>3-5</sup> and endurance<sup>5</sup> compared to matched healthy controls.

The National Institute for Health and Care Excellence (NICE) recommends regular assessment for and offering pulmonary rehabilitation (PR) to people with IPF.<sup>6</sup> However, people with advanced disease and severe breathlessness may have difficulties undertaking PR as ventilatory limitation may preclude effective whole body training.<sup>7</sup> Centre-based PR or exercise programme completion rates range from 43%<sup>8</sup> to 94%.<sup>9</sup> People with more severe disease and those unwilling to participate in group programmes are less likely to complete these programmes.<sup>10</sup> Accordingly, home-based ways of conferring the benefits of exercise are required.

Guidance from NICE states that in people not suitable for, or unable to participate in, existing rehabilitation programmes, neuromuscular electrical stimulation (NMES) of the quadriceps offers an alternative means of enhancing muscle strength.<sup>11</sup> NMES uses a small battery-operated stimulator which, via surface electrodes placed on the anterior thigh, produces a controlled contraction and relaxation of the underlying muscles. It is safe, relatively inexpensive and is performed seated at home. In people with advanced chronic disease including COPD, heart failure, and cancer, a meta-analysis demonstrated that compared to placebo, NMES led to a significant improvement in quadriceps strength, muscle mass and exercise capacity.<sup>12</sup> Therefore, NMES may be a potential treatment for muscle weakness in advanced progressive disease and could be considered a suitable home intervention for people with muscle weakness who have difficulty engaging with existing PR services.<sup>11, 12</sup> To date there are no published studies exploring the role or effects of NMES in IPF, although there is one small randomised control trial (n=30) comparing active

1 NMES plus aerobic exercise to placebo NMES plus aerobic exercise that is currently recruiting people with  
2 IPF (NCT03890250).. Therefore, we aimed to determine the acceptability of NMES of the quadriceps in  
3 people with IPF and to identify whether a future definitive trial is feasible.  
4  
5  
6  
7  
8

## 9 **MATERIALS AND METHODS**

### 10 **Study design and participants**

11  
12  
13 We conducted a randomised, parallel, two-group, participant- and assessor-blinded, placebo-controlled  
14 feasibility trial with embedded qualitative interviews. The trial was conducted and reported according to  
15 the CONSORT 2010 statement: extension to randomised pilot and feasibility trials.<sup>13</sup> Participants were  
16 recruited from outpatient clinics at the Royal Brompton and Harefield Hospitals, UK between November  
17 2018 and February 2020. The inclusion criteria were 1) diagnosis of IPF according to international  
18 guidelines,<sup>14</sup> 2) Medical Research Council (MRC) dyspnoea score  $\geq 3$ , 3) quadriceps maximum voluntary  
19 contraction (QMVC)  $< 80\%$  predicted,<sup>15</sup> 4) declined or failed to complete supervised centre-based PR and 5)  
20 ability to provide informed consent. People were excluded for the following reasons 1) cardiac pacemaker,  
21 2) co-existing neurological condition e.g. lower limb paralysis, 3) completion of PR within the previous six  
22 months, 4) change in medication and/or exacerbation requiring hospitalisation within the previous four  
23 weeks or 5) current regular exerciser (structured exercise  $\geq 3$ /week in the previous month). All participants  
24 provided written informed consent. The trial was pre-registered on clinicaltrials.gov (NCT03499275) and  
25 the study was approved by London-Harrow Research Ethics Committee and Health Research Authority  
26 (18/LO/0209).  
27  
28  
29  
30  
31  
32  
33  
34  
35  
36  
37  
38  
39  
40  
41  
42  
43  
44  
45  
46  
47  
48  
49

### 50 **Randomisation and blinding**

51  
52  
53 Following baseline assessment, participants were randomly allocated 1:1 at the individual level to receive  
54 active or placebo NMES. Minimization was used to balance groups for age ( $< 65$  years vs.  $\geq 65$  years), sex  
55 (male vs. female) and quadriceps strength ( $< 20$ kg vs.  $\geq 20$ kg). The allocation sequence was generated using  
56  
57  
58  
59  
60

1 an independent web-based randomisation system within the UK Clinical Research Collaboration-registered  
2 King's Clinical Trials Unit. Following randomisation, the Clinical Trials Unit informed trial staff by secure  
3 email. An unblinded researcher selected an active or placebo device accordingly. Blinded researchers  
4 were informed of trial entry but not group allocation. The participant was not informed of group allocation.  
5 Subsequent assessment visits were completed immediately after the six-week intervention period and at  
6 12 weeks by a researcher blinded to group allocation. Qualitative in-depth, topic-guided interviews were  
7 completed in a sub-group of participants who were selected purposively to include both intervention and  
8 control groups, sexes, and a range of baseline MRC scores so that different perspectives could be explored.  
9

## 20 **Interventions**

21 The treating healthcare professionals provided potential participants with the study information leaflet  
22 who were then screened by the research team via telephone. Those interested in participating in the study  
23 attended an assessment to confirm eligibility.  
24

25 The interventions were based on a combination of patient and public involvement feedback and published  
26 studies.<sup>16</sup> The NMES programme was a self-administered, home-based protocol involving 30 minutes  
27 stimulation of bilateral quadriceps muscles for six weeks. The active device was KneeHab<sup>®</sup>XP (Neurotech,  
28 USA) and the placebo device, MicroStim Exercise Stimulator MS2v2 (Odstock Medical Ltd, UK).  
29 Although different machines were used for the active and placebo devices, they were outwardly identical  
30 as both were covered in the same garment (online supplement). The parameters of both devices were the  
31 same (frequency 50Hz, pulse width 400µs, duty cycle 18–33% which increased weekly for the first three  
32 weeks) except for the amplitude range (active: 0-120mA; placebo: 0-20mA). Consequently, participants in  
33 the control group received sensory feedback during stimulation but the device did not elicit a tetanic  
34 muscle contraction.  
35  
36  
37  
38  
39  
40  
41  
42  
43  
44  
45  
46  
47  
48  
49  
50  
51  
52  
53  
54  
55  
56  
57  
58  
59  
60

1 Participants in both groups also received a leaflet on how to manage breathlessness and an individualised  
2 home exercise programme supplemented with a manual which they were instructed to perform at least  
3 three times per week (online supplement).  
4  
5  
6  
7

8 The unblinded researcher delivered a standardised 40-minute training session to participants in both  
9 groups to demonstrate and supervise NMES application and the home exercise programme. Participants  
10 were provided with a diary to record NMES and exercise performance. During the six-week intervention  
11 period, the unblinded researcher telephoned participants weekly to review and progress NMES use and  
12 home exercise performance. To progress NMES, participants were asked to increase the amplitude of the  
13 electrical current, within the limits of the device.  
14  
15  
16  
17  
18  
19  
20  
21  
22

## 23 **Outcome measures**

### 24 **Primary outcome measures**

25  
26  
27 The primary outcomes were related to feasibility: participant recruitment and retention, treatment uptake  
28 and adherence, feasibility of outcome assessments, feasibility of participant and assessor blinding and  
29 adverse events related to the interventions. To assess recruitment- and retention-related feasibility  
30 outcomes, the numbers of potential eligible participants as well as recruitment and retention rates at the  
31 six- and 12-week assessments were recorded. To assess treatment uptake and adherence, the following  
32 were recorded; feasibility, outcomes, rates of uptake of and adherence to the allocated intervention and  
33 frequency and time spent using the NMES device and performing the home exercise programme.  
34 Feasibility of outcome assessment was measured by recording the amount of missing data for each  
35 outcome measure at each assessment. Participant and assessor blinding were assessed by the unblinded  
36 researcher at the six-week assessment, and six- and 12-week assessment respectively. Research staff  
37 recorded adverse events during assessment visits and weekly telephone calls. These were classified as  
38 related or unrelated to the allocated intervention, using as much information as available to determine the  
39 potential attribution of the event.  
40  
41  
42  
43  
44  
45  
46  
47  
48  
49  
50  
51  
52  
53  
54  
55  
56  
57  
58  
59  
60

## Secondary outcome measures

The secondary outcome measures were those that had the potential to be primary or secondary outcomes in a definitive clinical trial. These were: exercise capacity (six-minute walk test-6MWT),<sup>17</sup> functional performance (Short Physical Performance Battery-SPPB),<sup>18</sup> four metre gait speed (4MGS),<sup>19</sup> rectus femoris size (ultrasound of rectus femoris cross-sectional area (Mindray DP-50, Caiyside Imaging Ltd., Scotland), quadriceps strength (isometric QMVC),<sup>20</sup> health-related quality of life (King's Brief Interstitial Lung Disease questionnaire-KBILD),<sup>21</sup> activities of daily living (London Chest Activities of Daily Living-LCADL),<sup>22</sup> and physical activity parameters (daily step count, time spent in sedentary, light and moderate intensity activity (SenseWear, Bodymedia, USA)).<sup>23</sup>

Following the 12-week assessment, purposively sampled participants were invited to take part in semi-structured, topic-guided, telephone-based interviews. The audio-recorded interviews explored experiences of the intervention, how it impacted perceptions of outcome, acceptability of outcome measures and trial conduct in order to inform the rationale for and conduct of a definitive trial. The topic guides were updated inductively to reflect experiences and perceptions raised during previous interviews.

## Sample size

Sample size estimation was performed to achieve the primary feasibility outcomes, and not to detect differences in the secondary outcome measures. Based on guidance in the literature, we estimated that a sample size of 60 (30 per group) would be sufficient to adequately evaluate the feasibility of undertaking a definitive trial. A sample size of ten was chosen for the qualitative interviews as it was based on the predicted minimum number of interviews required to achieve data saturation and is based on the concept of Information Power.<sup>24</sup>

## Statistical analysis

The feasibility outcomes and baseline demographics were described and summarised overall and by trial group using proportions (percentage) or median (25<sup>th</sup>, 75<sup>th</sup> centile). The baseline data and change at six

1 and 12 weeks was reported as median (25<sup>th</sup>, 75<sup>th</sup> centile) or median (25<sup>th</sup>, 75<sup>th</sup> centile) change for each trial  
2  
3 group.

4  
5  
6 Anonymised interview transcripts were transcribed verbatim and imported into NVIVO (QSR International,  
7  
8 Australia) to facilitate analysis using the Framework Method.<sup>25</sup> The coding frame was pre-defined and  
9  
10 included experiences of the interventions, impact of intervention on perceived outcome, acceptability and  
11  
12 experiences of trial conduct and acceptability of the outcome measures. During indexing, secondary codes  
13  
14 were inductively applied. A mixed-method matrix<sup>26</sup> of qualitative and key quantitative data was used to  
15  
16 illuminate barriers and facilitators for intervention completion by participants to inform protocol  
17  
18 adaptation and/or optimisation.  
19  
20  
21

### 22 23 24 Patient and public involvement (PPI)

25  
26  
27 This research has included PPI throughout each stage. Two PPI representatives were involved in the design  
28  
29 of the study and intervention and met the project manager at regular intervals throughout the study. The  
30  
31 PPI representatives also provided input into written material for participants and topic guides for  
32  
33 qualitative interviews. Going forward, they will have a role in in dissemination of research findings to lay  
34  
35 audiences.  
36  
37  
38  
39  
40

## 41 **RESULTS**

### 42 43 **Primary outcome**

#### 44 45 46 Feasibility of recruitment and retention

47  
48  
49  
50 We screened 364 people, of whom 153 were assessed for eligibility and 23 consented to participate in the  
51  
52 study: 11 were allocated to both the intervention and control groups and one was withdrawn prior to  
53  
54 randomisation for safety reasons (figure 1). By far the most common reason for failing the telephone-  
55  
56 based screening assessment was the distance participants were required to travel to the research centre  
57  
58 (n=153). MRC<3 (n=55) or PR completion within six months (n=24) were the most common reasons for  
59  
60

1 failing the eligibility assessment. At the six-week assessment, two participants in both groups were lost to  
 2 follow-up (intervention: n=2 missed visit, control: n=2 withdrew from the study). At the 12-week  
 3 assessment, all participants in the intervention group were assessed whereas three participants in the  
 4 control group were lost to follow-up (withdrew from the study).  
 5  
 6  
 7  
 8

#### 9 Feasibility of treatment uptake and adherence

10 All participants started their allocated intervention. Both groups received the same median number of  
 11 weekly telephone calls but there was a trend for higher frequency and duration of use of the NMES device  
 12 and home exercise programme in the intervention compared to the control group (table 1). All  
 13 participants in the intervention group completed the allocated intervention. In contrast, four participants  
 14 in the control group discontinued the intervention: n=2: did not tolerate placebo NMES, n=1 unwell, n=1:  
 15 felt NMES was ineffective.  
 16  
 17  
 18  
 19  
 20  
 21  
 22  
 23  
 24  
 25  
 26  
 27  
 28  
 29  
 30  
 31  
 32

33 Table 1. Intervention uptake, adherence and completion

| 36 Variable                                        | 37 Intervention | 38 Control      |
|----------------------------------------------------|-----------------|-----------------|
| 39 Number of weekly telephone calls                | 6 (5, 6)        | 6 (4, 6)        |
| 40 Number of times device* used between V1 and V2  | 31 (22, 44)     | 24 (4, 40)      |
| 41 Total minutes device* used between V1 and V2    | 930 (660, 1110) | 570 (120, 1230) |
| 42 Number of times HEP performed between V1 and V2 | 20 (17, 32)     | 14 (4, 26)      |
| 43 Total minutes HEP performed between V1 and V2   | 906 (600, 1527) | 648 (110, 1399) |

44 Data reported number or median (25<sup>th</sup>, 75<sup>th</sup>) centile.

45 \*Device: Intervention group: Active stimulator; Control group: Placebo stimulator.

46 Abbreviations: HEP: Home Exercise Programme; NC: Not Computed; V: Visit.

#### 47 Feasibility of outcome assessment



1 Missing data for each clinical outcome according to assessment timepoint are described in the online  
2 supplement. There were no missing data at the baseline assessment. Missing data at the six- and 12-week  
3 assessments mostly related to participants that were lost to follow up. The outcome measures with the  
4 most missing data were the physical activity parameters (intervention, control: baseline: n=4, n=4; six and  
5 12 weeks: n=5, n=6). Reasons for missingness included participants declining to wear the device and  
6 insufficient data to analyse.  
7  
8  
9  
10  
11  
12  
13  
14

#### 15 Feasibility of participant and outcome assessor blinding

16 Participant blinding was maintained in the intervention group but three participants in the control group  
17 were unblinded as they did not believe the placebo NMES was credible. The outcome assessor remained  
18 blinded to intervention allocation of all participants.  
19  
20  
21  
22  
23  
24  
25

#### 26 Adverse and serious adverse events

27 There was one serious adverse event in the intervention group and four in the control group. None of  
28 these events were unexpected or related to the allocated intervention or assessments. One participant  
29 experienced two adverse events prior to randomisation. A total of 10 and five adverse events in the  
30 intervention and control groups were experienced by eight and four participants respectively. None of the  
31 events prior to randomisation or in the control group were unexpected or related to the study. Three  
32 adverse events in the intervention group were expected and related to the study. These included redness  
33 on anterior thigh and itchiness on anterior thigh following NMES use as well as “burning sensation” on  
34 anterior thigh during NMES use. The remaining seven adverse events were expected and unrelated to the  
35 intervention.  
36  
37  
38  
39  
40  
41  
42  
43  
44  
45  
46  
47  
48  
49  
50  
51

#### 52 Secondary outcomes

53 The groups were balanced in terms of age, gender, absolute and relative forced vital capacity (FVC) values,  
54 body mass index and quadriceps strength (table 2). However, compared to the intervention group, the  
55  
56  
57  
58  
59  
60

control group had a greater proportion of participants diagnosed with pulmonary hypertension, prescribed supplementary oxygen and corticosteroid, former smokers and worse absolute and relative diffusing capacity of the lung for carbon monoxide (DLCO) values, exercise capacity, activities of daily life performance, walking speed and physical activity levels. Due to the small number of participants in each group, it was not possible to test for between-group differences.

Table 2. Baseline characteristics

|                                                        | Whole group (n=22)       | Intervention (n=11)     | Control (n=11)          |
|--------------------------------------------------------|--------------------------|-------------------------|-------------------------|
| Gender: male (%)                                       | 16 (73)                  | 7 (64)                  | 8 (73)                  |
| Age (years)                                            | 76 (74, 82)              | 77 (73, 81)             | 76 (74, 84)             |
| MRC Dyspnoea score                                     | 4 (4, 4)                 | 4 (4, 4)                | 4 (4, 4)                |
| BMI (kg/m <sup>2</sup> )                               | 24.4 (22.4, 29.1)        | 24.2 (22.0, 26.5)       | 25.2 (22.6, 29.2)       |
| FEV <sub>1</sub> /FVC                                  | 0.84 (0.78, 0.86)        | 0.80 (0.77, 0.85)       | 0.84 (0.78, 0.87)       |
| FVC (L)                                                | 1.83 (1.39, 2.44)        | 1.83 (1.44, 2.45)       | 1.82 (1.22, 2.44)       |
| FVC (% predicted)                                      | 61.8 (49.8, 75.0)        | 63.0 (49.0, 78.2)       | 60.5 (50.0, 68.0)       |
| DLCO (ml/mi/mmHg)                                      | 2.16 (1.71, 2.77)        | 2.50 (1.92, 3.36)       | 1.88 (1.64, 2.20)       |
| DLCO (% predicted)                                     | 26.0 (21.9, 36.7)        | 36.5 (22.3, 40.4)       | 25.0 (20.8, 29.8)       |
| Smoking status: never/former/current: (%)              | 13 (59) / 9 (41) / 0 (0) | 7 (64) / 4 (36) / 0 (0) | 6 (55) / 5 (45) / 0 (0) |
| Smoking pack year history                              | 0 (0, 8)                 | 0 (0, 5)                | 0 (0, 13)               |
| Age-adjusted Charlson Co-morbidity Index               | 2 (0, 5)                 | 4 (0, 5)                | 0 (0, 6)                |
| COPD: n (%)                                            | 3 (14)                   | 1 (10)                  | 2 (18)                  |
| Pulmonary hypertension: n (%)                          | 2 (9)                    | 0 (0)                   | 2 (18)                  |
| Ischaemic heart disease: n (%)                         | 8 (36)                   | 5 (46)                  | 3 (27)                  |
| Obstructive sleep apnoea: n (%)                        | 0 (0)                    | 0 (0)                   | 0 (0)                   |
| Self-reported hospitalisations in previous year: n (%) | 0 (0, 0)                 | 0 (0, 0)                | 0 (0, 0)                |
| Self-reported chest infections in previous year: n (%) | 1 (1, 2)                 | 1 (1, 2)                | 1 (1, 1)                |
| Oxygen: n (%)                                          |                          |                         |                         |
| Long-term                                              | 4 (18)                   | 1 (10)                  | 3 (27)                  |
| Ambulatory                                             | 9 (41)                   | 4 (36)                  | 5 (46)                  |

|                                                        |                   |                   |                   |
|--------------------------------------------------------|-------------------|-------------------|-------------------|
| Walking aid: n (%)                                     | 5 (23)            | 2 (18)            | 3 (27)            |
| Prescribed pirfenidone: n (%)                          | 6 (27)            | 4 (36)            | 2 (18)            |
| Prescribed nintedanib: n (%)                           | 7 (32)            | 4 (36)            | 3 (27)            |
| Prescribed corticosteroid: n (%)                       | 4 (18)            | 3 (27)            | 1 (9)             |
| 6MWT (m)                                               | 289 (149, 360)    | 326 (150, 361)    | 240 (130, 325)    |
| SPPB score                                             | 9 (6, 11)         | 10 (6, 11)        | 7 (4, 11)         |
| Four metre gait speed (m/s)                            | 0.71 (0.50, 0.94) | 0.82 (0.38, 0.97) | 0.66 (0.51, 0.84) |
| QMVC (kg)                                              | 22.4 (15.6, 28.7) | 22.5 (15.1, 28.3) | 22.4 (15.7, 31.3) |
| QMVC (% predicted)                                     | 62.4 (52.0, 69.1) | 64.3 (44.0, 68.1) | 61.6 (52.8, 72.2) |
| Rectus femoris cross-sectional area (mm <sup>2</sup> ) | 459 (371, 534)    | 451 (321, 579)    | 479 (375, 581)    |
| KBILD - Psychological                                  | 54.4 (53.2, 69.1) | 58.8 (41.2, 71.6) | 53.5 (43.8, 65.5) |
| KBILD – Breathlessness and activities                  | 35.6 (21.6, 45.9) | 37.8 (27.0, 50.2) | 35.6 (17.7, 41.9) |
| KBILD – Chest symptoms                                 | 68.6 (44.0, 85.2) | 63.7 (44.0, 85.2) | 73.4 (54.3, 85.2) |
| KBILD – Total score                                    | 53.5 (46.4, 59.4) | 56.1 (43.9, 66.4) | 53.5 (47.2, 56.1) |
| LCADL – Self-care                                      | 6.0 (4.0, 8.0)    | 7.0 (4.0, 8.0)    | 6.0 (4.0, 7.0)    |
| LCADL – Domestic                                       | 10.5 (4.8, 18.5)  | 5.0 (1.0, 17.0)   | 14.0 (10.0, 22.0) |
| LCADL – Physical                                       | 4.0 (3.0, 6.0)    | 4.0 (3.0, 5.0)    | 4.0 (3.0, 6.0)    |
| LCADL – Leisure                                        | 4.0 (3.0, 6.0)    | 4.0 (3.0, 6.0)    | 5.0 (4.0, 6.0)    |
| LCADL – Total score                                    | 26.0 (17.5, 37.3) | 20.0 (14.0, 28.0) | 33.0 (22.0, 29.0) |
| Daily step count                                       | 1511 (776, 3456)  | 1820 (1148, 3232) | 988 (657, 4115)   |
| Daily mins spent in moderate intensity PA              | 34 (20, 84)       | 47 (25, 100)      | 22 (5, 74)        |
| Daily mins spent in light intensity PA                 | 194 (147, 221)    | 217 (126, 248)    | 187 (153, 199)    |
| Daily mins spent sedentary                             | 1144 (1098, 1206) | 1123 (1095, 1151) | 1194 (1137, 1237) |

Data reported as number (percentage) or median (25<sup>th</sup> centile, 75<sup>th</sup> centile).

*Abbreviations: 6MWT: Six Minute Walk Test; CI: Confidence Interval; DLCO: Diffusing Capacity of the Lung for Carbon Monoxide; EQ5D5L: EQ5D 5-Levels; KBILD: King's Brief Interstitial Lung Disease questionnaire; LCADL: London Chest Activities of Daily Living questionnaire; P: p-value; PA: Physical Activity; QMVC: Quadriceps Maximum Voluntary Contraction; SPPB: Short Physical Performance Battery.*

*KBILD domains and total score: Range 0-100; higher scores indicate better health-related quality of life.*

*LCADL range: Self-care: 0-20; Domestic: 0-30; Physical: 0-10; Leisure: 0-15; Total: 0-75; higher scores indicate greater impact on ADL performance.*

1 The response to the intervention between baseline and six-week assessment, and baseline and 12-week  
2 assessment are shown in tables 3 and 4 respectively. Again, owing to the small numbers of participants, it  
3 is not possible to draw firm conclusions from these data. However, between the baseline and six-week  
4 assessment, there was trend for a greater reduction in sedentary time in the intervention group, compared  
5 to an increase in sedentary time in the control group (table 3). Similarly, between the baseline and 12-  
6 week assessment, there was a trend for a greater increase in rectus femoris cross-sectional area, self-care  
7 related to activities of daily living performance and time spent in light intensity physical activity in the  
8 intervention compared to the control group (table 4).  
9  
10  
11  
12  
13  
14  
15  
16  
17  
18  
19  
20  
21  
22  
23  
24  
25  
26  
27  
28  
29  
30  
31  
32  
33  
34  
35  
36  
37  
38  
39  
40  
41  
42  
43  
44  
45  
46  
47  
48  
49  
50  
51  
52  
53  
54  
55  
56  
57  
58  
59  
60

Table 3. Draft table for the within and between group response of the secondary outcome measures to the intervention from Visit 1 to Visit 2.

| Outcome                                                  | Intervention |                         | Control |                         |
|----------------------------------------------------------|--------------|-------------------------|---------|-------------------------|
|                                                          | n            | Within group difference | n       | Within group difference |
| Δ 6MWT (m)                                               | 9            | 6 (-16, 45)             | 8       | -17 (-74, 4)            |
| Δ SPPB                                                   | 9            | 0 (-1, 1)               | 8       | 0 (0, 0)                |
| Δ Four metre gait speed (m/s)                            | 9            | 0.03 (0.01, 0.06)       | 8       | -0.04 (-0.09, 0.03)     |
| Δ QMVC (kg)                                              | 9            | -0.1 (-1.9, 2.5)        | 8       | -0.2 (-1.7, 2.0)        |
| Δ Rectus femoris cross-sectional area (mm <sup>2</sup> ) | 9            | 18.0 (-32.6, 48.3)      | 8       | 16.0 (-50.6, 33.0)      |
| Δ KBILD - Psychological                                  | 9            | 5.9 (-3.4, 12.8)        | 9       | 0 (-7.2, 9.6)           |
| Δ KBILD - Breathlessness and activities                  | 9            | 9.3 (-7.8, 13.8)        | 9       | 0 (-8.4, 13.5)          |
| Δ KBILD – Chest symptoms                                 | 9            | 9.7 (-5.9, 16.7)        | 9       | 9.7 (-5.9, 22.9)        |
| Δ KBILD – Total score                                    | 9            | 2.7 (-0.2, 7.4)         | 9       | 0.1 (-2.2, 3.9)         |
| Δ LCADL – Self-care                                      | 9            | -1.0 (-2.0, 0.0)        | 9       | 1.0 (-0.5, 1.5)         |
| Δ LCADL - Domestic                                       | 9            | 1.0 (-3.0, 4.5)         | 9       | -1.0 (-3.0, -5.0)       |
| Δ LCADL – Physical                                       | 9            | 0.0 (-0.5, 0.5)         | 9       | 0.0 (-1.0, 1.5)         |
| Δ LCADL – Leisure                                        | 9            | 0.0 (-1.0, 1.0)         | 9       | 0.0 (-1.0, 1.5)         |
| Δ LCADL – Total score                                    | 9            | 0.0 (-5.0, 2.0)         | 9       | 4.0 (-3.0, 10.0)        |
| Δ Daily step count                                       | 5            | -270 (-504, 877)        | 5       | -740 (-2026, -230)      |
| Δ Daily mins spent in moderate intensity PA              | 5            | -3 (-20, 4)             | 5       | -19 (-51, -5)           |
| Δ Daily mins spent in light intensity PA                 | 5            | 24 (5, 71)              | 5       | -39 (-65, 15)           |

|                              |   |                |   |             |
|------------------------------|---|----------------|---|-------------|
| Δ Daily mins spent sedentary | 5 | -40 (-58, -21) | 5 | 54 (22, 86) |
|------------------------------|---|----------------|---|-------------|

Data reported as median (25<sup>th</sup> centile, 75<sup>th</sup> centile) difference.

Abbreviations: 6MWT: Six Minute Walk Test; CI: Confidence Interval; EQ5D5L: EQ5D 5-Levels; KBILD: King's Brief Interstitial Lung Disease questionnaire; LCADL: London Chest Activities of Daily Living questionnaire; P: p-value; QMVC: Quadriceps Maximum Voluntary Contraction; SPPB: Short Physical Performance Battery.

KBILD domains and total score: Range 0-100; higher scores indicate better health-related quality of life.

LCADL range: Self-care: 0-20; Domestic: 0-30; Physical: 0-10; Leisure: 0-15; Total: 0-75; higher scores indicate greater impact on ADL performance.

For peer review only

Table 4. Draft table for the within and between group response of the secondary outcome measures to the intervention from Visit 1 to Visit 3.

| Outcome                                                  | Intervention |                         | Control |                         |
|----------------------------------------------------------|--------------|-------------------------|---------|-------------------------|
|                                                          | n            | Within group difference | n       | Within group difference |
| Δ 6MWT (m)                                               | 10           | -13 (-73, -15)          | 6       | -23 (-100, 18)          |
| Δ SPPB                                                   | 10           | 0 (-1, 0)               | 7       | 0 (-1, 1)               |
| Δ Four metre gait speed (m/s)                            | 10           | -0.03 (-0.14, 0.08)     | 7       | 0.01 (-0.12, 0.09)      |
| Δ QMVC                                                   | 11           | 1.0 (-0.9, 4.3)         | 7       | -1.7 (-3.4, 3.7)        |
| Δ Rectus femoris cross-sectional area (mm <sup>2</sup> ) | 11           | 32.6 (2.5, 54.4)        | 7       | -48.6 (-87.8, 10.0)     |
| Δ KBILD - Psychological                                  | 11           | 7.8 (4.6, 19.1)         | 8       | 4.2 (-4.1, 8.7)         |
| Δ KBILD - Breathlessness and activities                  | 11           | 9.3 (-7.5, 13.6)        | 8       | 0 (-10.0, 5.9)          |
| Δ KBILD – Chest symptoms                                 | 11           | 10.3 (0, 19.7)          | 8       | 10.8 (0, 24.9)          |
| Δ KBILD – Total score                                    | 11           | 5.4 (1.1, 8.8)          | 8       | 2.6 (-4.1, 4.3)         |
| Δ LCADL – Self-care                                      | 11           | -1.0 (-2.0, 0.0)        | 8       | 1.0 (0.3, 2.5)          |
| Δ LCADL - Domestic                                       | 11           | 1.0 (-1.0, 3.0)         | 8       | 4.0 (-2.5, 9.5)         |
| Δ LCADL – Physical                                       | 11           | 0.0 (-1.0, 0.0)         | 8       | 0.0 (-1.0, 1.8)         |
| Δ LCADL – Leisure                                        | 11           | 0.0 (0.0, 1.0)          | 8       | 0.5 (-0.8, 2.8)         |
| Δ LCADL – Total score                                    | 11           | 1.0 (-2.0, 5.0)         | 8       | 4.5 (0.8, 15.3)         |
| Δ Daily step count                                       | 5            | -215 (-966, 176)        | 5       | -334 (-2712, 7)         |
| Δ Daily mins spent in moderate intensity PA              | 5            | 2 (-29, 22)             | 5       | 2 (-31, -11)            |
| Δ Daily mins spent in light intensity PA                 | 5            | 37 (-46, 54)            | 5       | -3 (-61, 35)            |

|                              |   |             |   |             |
|------------------------------|---|-------------|---|-------------|
| Δ Daily mins spent sedentary | 5 | 8 (-29, 87) | 5 | 7 (-24, 50) |
|------------------------------|---|-------------|---|-------------|

Data reported as median (25<sup>th</sup> centile, 75<sup>th</sup> centile) difference.

Abbreviations: 6MWT: Six Minute Walk Test; CI: Confidence Interval; EQ5D5L: EQ5D 5-Levels; KBILD: King's Brief Interstitial Lung Disease questionnaire; LCADL: London Chest Activities of Daily Living questionnaire; P: p-value; QMVC: Quadriceps Maximum Voluntary Contraction; SPPB: Short Physical Performance Battery.

KBILD domains and total score: Range 0-100; higher scores indicate better health-related quality of life.

LCADL range: Self-care: 0-20; Domestic: 0-30; Physical: 0-10; Leisure: 0-15; Total: 0-75; higher scores indicate greater impact on ADL performance.

For peer review only



1 Six participants (four male, two female), aged between 54 and 84 years, participated in the qualitative  
2 interviews. The majority had been allocated to the intervention group, with only one participant from the  
3 control group. Other participants allocated to the control group who were approached to take part in the  
4 interviews declined or were unable to take part because of illness or death. Despite interviewing almost  
5 one third of participants that were recruited to the trial, new data was being gained up to and including  
6 the last interview.  
7  
8  
9  
10  
11  
12  
13  
14  
15

16 All participants found the research staff, trial processes and outcome measures acceptable:

17  
18  
19 *"I was able to comply with what was required,..., other than the fact that the walking is limited, but*  
20 *at least I could rest."* [Male, 80's, intervention group]  
21  
22  
23  
24

25 Most participants stated that the NMES device was feasible and acceptable:

26  
27  
28 *"The instructions were pretty straightforward, and once you have done it the first time,..., you just*  
29 *got it out of the bag and off you went."* [Male, 80's, intervention group]  
30  
31  
32  
33

34 However two participants reported negative NMES experiences:

35  
36  
37 *"It was a damn nuisance, to be perfectly frank,..., no, it was a bit of a performance and a bit of a*  
38 *nuisance."* [Female, 70's, intervention group]  
39  
40  
41  
42

43 *"It was as if it was a placebo in place of the real thing,..., yes, I would say that it was the placebo, it*  
44 *wasn't the real thing."* [Male, 70's, control group]  
45  
46  
47

48 All participants reported that the exercise programme was feasible, acceptable and beneficial:

49  
50  
51 *"I'm still doing them, actually. It's a good programme"* [Female, 70's, intervention group]  
52  
53  
54

55 However, maintaining motivation to complete the programme was difficult with one participant stating  
56 that he did so because it was part of the study:  
57  
58  
59  
60

1 *"I made sure I did the leg exercises [even when unwell] because that's what I promised I would do"*

2  
3 [Male, 60's, intervention group]

4  
5  
6 There was disparity in participants' experience of the weekly telephone support during the six-week  
7  
8 intervention period. Some found it burdensome and suggested that digital monitoring would have been  
9  
10 preferable:

11  
12  
13  
14 *"That [provision of electronic version of home exercise programme] would have better. Yes, that would*  
15  
16 *have been brilliant, and to then send it [diary reporting compliance and progress] back that way too"*

17  
18  
19 [Female, 70's, intervention group]

20  
21  
22 In contrast, other participants found it to be a positive experience and suggested more frequent  
23  
24 monitoring would have been preferable:

25  
26  
27  
28 *"I think once a week, or maybe twice a week would be a secondary call, if you did it on a Monday and then*  
29  
30 *on a Friday"* [Male, 60's, intervention group]

31  
32  
33 In addition, some participants reported that diary completion was difficult which affected their compliance  
34  
35 with this tool:

36  
37  
38  
39 *"I didn't fill in the form right. I didn't find the form very easy. I did it my own way"* [Female, 70's,  
40  
41  
42 intervention group]

## 43 44 45 46 47 48 **DISCUSSION**

49  
50  
51 We aimed to determine the acceptability of NMES of the quadriceps muscles in people with IPF and  
52  
53 identify whether a future definitive trial is feasible. The qualitative interviews suggest that participants  
54  
55 found the trial process, active NMES device and home exercise programme acceptable, but there were  
56  
57 concerns about the credibility of placebo NMES and divergent opinions regarding the telephone support  
58  
59  
60

1 and diary. The quantitative data demonstrate that a definitive trial using this protocol should not be  
2 undertaken because of challenges in participant recruitment as well as between-group differences in  
3 retention of, treatment adherence and blinding of participants in the control compared to the intervention  
4 group. However, this feasibility study provided important additional information that could inform future  
5 rehabilitation-based interventions.  
6  
7  
8  
9  
10  
11  
12

### 13 Primary feasibility outcomes

14  
15  
16 The principle reason this protocol in its current format should not be tested in a definitive trial is that an  
17 insufficient number of participants were recruited to satisfy the a priori sample size requirement. A total  
18 of 364 potential participants were screened with 211 excluded prior to the eligibility assessment. The main  
19 reason for exclusion was the distance between the person's home and assessment centre, despite the  
20 provision of transport. The Interstitial Lung Disease (ILD) Unit at our hospital provides specialist care to  
21 people that live in a large geographic area, which may explain the reluctance to participate in the study.  
22  
23 Although we have not faced such recruitment issues in other studies, our experience with this protocol  
24 suggests future rehabilitation-based research should be multi-site and conducted alongside clinical  
25 appointments and/or located in centres accessible to participants and/or in participants' homes. Out of  
26 153 participants that attended the eligibility assessment, 23 consented to participate in the study. The  
27 most common reason for failing this assessment was MRC<3 or PR completion within six months. These  
28 conditions formed part of the inclusion criteria to ensure that people with advanced disease and a  
29 sedentary lifestyle respectively were recruited to the study. Going forward, trial eligibility based on  
30 indication for NMES rather than PR completion status may be more appropriate.  
31  
32  
33  
34  
35  
36  
37  
38  
39  
40  
41  
42  
43  
44  
45  
46  
47  
48  
49  
50

51 There was a trend for a greater proportion of participants in the control group to withdraw from the study,  
52 discontinue and perform less of the intervention, and/or become unblinded to group allocation. These  
53 findings may be related to statistical chance because of the small sample size, differences in between-  
54 group baseline characteristics and/or poor placebo NMES device credibility. The between-group difference  
55  
56  
57  
58  
59  
60

1 in baseline characteristics and concerns about placebo NMES credibility were unexpected findings, because  
2 the minimisation criteria used in the randomisation process and the placebo device were informed by  
3 previous studies.<sup>16</sup> Furthermore, although two different devices were used to deliver active and placebo  
4 NMES, the outward appearance of both were identical and as such, should not have contributed to the  
5 differences in participant perception. However, qualitative findings demonstrated that a participant in the  
6 control group believed he used a placebo device as the sensation was insufficiently strong. However as  
7 only one participant allocated to the control group agreed to participate in the qualitative interviews, it is  
8 unclear if this finding is generalisable. Future research should consider reviewing the intensity and/or  
9 individualise the intensity of the placebo device.  
10  
11  
12  
13  
14  
15  
16  
17  
18  
19  
20  
21  
22

23 In contrast to the control group, qualitative findings demonstrated that active NMES was acceptable to  
24 participants in the intervention group. In addition, the home exercise programme was also acceptable to  
25 both groups. However, there was a difference of opinion regarding the frequency of the telephone support  
26 and utility of the NMES and exercise diary. Exploration of these aspects of the intervention are important  
27 for future home-based rehabilitation studies in IPF.  
28  
29  
30  
31  
32  
33  
34  
35

36 Although blinding of some participants was not maintained, assessor blinding was successful. This was  
37 achieved by provision of an office isolated from the research laboratory that allowed the unblinded  
38 researcher inform participants of group allocation, deliver the training session and schedule telephone  
39 calls.  
40  
41  
42  
43  
44  
45  
46

47 The majority of the outcome measures were acceptable to participants and feasible to perform. However,  
48 there were a significant volume of missing accelerometer data because participants declined to wear the  
49 device or there was insufficient data to analyse. Going forward, researchers may decide to make wearing  
50 the device a prerequisite to study entry, shorten the device-wearing time or consider an alternative device  
51 that is more acceptable to participants.  
52  
53  
54  
55  
56  
57  
58  
59  
60

1 There was a difference in the amount of expected and related adverse events in the intervention  
2 compared to the control group. These events occurred during or following NMES use and did not result in  
3 discontinuation of the intervention. Although not categorised as serious, these findings reinforce the  
4 importance of explaining the risks associated with this type of intervention in the patient information  
5 sheet.  
6  
7  
8  
9  
10  
11  
12

### 13 Secondary outcome measures 14 15

16 Although the intervention and control groups were balanced in terms of the minimisation variables, there  
17 was imbalance in important variables that might influence exercise and physical activity capacity as a  
18 greater proportion of the control group were diagnosed with pulmonary hypertension and had a  
19 supplementary oxygen prescription associated with worse absolute and relative DLCO values, exercise  
20 capacity, activities of daily life performance, walking speed and physical activity levels. This may have  
21 arisen because of statistical chance given the small participant numbers, however, the minimisation  
22 variables used for randomisation may also have contributed to the problem. The minimisation variables:  
23 age, gender and quadriceps strength, were chosen as they were relevant to the population of interest and  
24 intervention, and were also informed by previous studies.<sup>16</sup> However, although there is a strong  
25 correlation between quadriceps strength and exercise capacity ( $r=0.56$ ,  $p<0.001$ ) in ILD,<sup>27</sup> accounting for  
26 exercise capacity itself, as well as co-morbidities and physical activity levels may be important in ensuring  
27 balance between trial groups in future research.  
28  
29  
30  
31  
32  
33  
34  
35  
36  
37  
38  
39  
40  
41  
42  
43  
44  
45  
46

47 Owing to the small sample size, imbalance in between-group baseline characteristics and smaller number  
48 of control versus intervention group participants, it is challenging to identify an outcome measure that has  
49 the potential to be a primary or secondary outcome measure in a definitive trial. However, as there was a  
50 trend for greater reduction in sedentary time between baseline and six weeks as well as a greater increase  
51 in self-care ability and light intensity physical activity between baseline and 12 weeks that favoured the  
52  
53  
54  
55  
56  
57  
58  
59  
60

1 intervention group, these outcomes may be worth exploring. However, as previously discussed, there was  
2  
3 a significant amount of missing accelerometer data.  
4  
5

## 6 Strengths and limitations 7 8

9 There are several strengths to this research. It was performed in line with the CONSORT 2010 statement.<sup>13</sup>

10  
11 One of the inclusion criteria was a measure of quadriceps strength, which ensured NMES was indicated in  
12  
13 the trial population. The intervention was based on patient and public involvement feedback and informed  
14  
15 by published trials.<sup>16</sup> We used an accepted placebo intervention to maintain participant blinding with  
16  
17 outcomes assessed by a blinded assessor. We tested numerous relevant outcome measures that could be  
18  
19 used in a definitive trial and undertook qualitative interviews that complemented the quantitative findings.  
20  
21  
22

23  
24 However, there were some limitations. The use of a single-centre in this trial likely contributed to under-  
25  
26 recruitment of participants and consequently, we conclude that the current protocol should not be used in  
27  
28 a definitive trial. This in turn led to insufficient recruitment of participants to the qualitative aspect,  
29  
30 specifically to the control group which is in part a limitation, but also provides initial data on feasibility.  
31  
32  
33 Consequently, data saturation of experiences and perceptions was not achieved. Accordingly, the  
34  
35 transferability of the qualitative findings may be limited.  
36  
37  
38

## 39 Conclusion 40 41

42 We conclude that a definitive clinical trial to investigate the efficacy of NMES of the quadriceps muscles in  
43  
44 advanced IPF using this protocol is not feasible. However, novel findings such as the frequency of  
45  
46 telephone support, exercise and NMES diary format and choice of support and monitoring platform e.g.  
47  
48 online versus telephone, could inform trials of future home rehabilitation interventions in this population.  
49  
50  
51  
52  
53  
54  
55

## 56 Figure legend 57

58  
59 Figure 1. CONSORT diagram  
60

1 **Author contributions:** Concept and Design of Study: CMN, MM, WM; Acquisition of Data: CMN, OP, SP,  
2 REB, JAW; Analysis of Data: CMN, REB, WM; Drafting of Manuscript: CMN, REB, WM; Revision of  
3 manuscript critically for important intellectual content: CMN, MM, WM, OP, SP, REB, JAW, PMG, EAR,  
4  
5 A UW, PLM, VK, FC, TMM; Approval of final manuscript: CMN, MM, WM, OP, SP, REB, JAW, PMG, EAR,  
6  
7  
8  
9 A UW, PLM, VK, FC, TMM authors.

10  
11  
12  
13  
14  
15 **Competing interest statement:**

- 16 • CMN reports receiving fees from Novartis, outside of this work
- 17
- 18 • SP, REB, JAW, OP, MM report no competing interests
- 19
- 20 • PMG reports fees, honoraria and grants from Roche Pharmaceuticals, Boehringer Ingelheim, Cipla
- 21 and Brainomix.
- 22
- 23 • EAR reports lecture and/or advisory board fees and/or grants from Roche Pharmaceuticals and
- 24 Boehringer Ingelheim.
- 25
- 26 • AUW reports speaking and consultancy fees from Roche and Boehringer Ingelheim.
- 27
- 28 • PLM reports receiving fees from AstraZeneca, Boehringer Ingelheim and Hoffman-La Roche, outside
- 29 the submitted work.
- 30
- 31 • VK reports fees from Roche outside of the submitted work.
- 32
- 33 • FC reports fees from Boehringer-Ingelheim and Roche outside of the submitted work.
- 34
- 35 • TMM has, via his institution, received industry-academic funding from Astra Zeneca and
- 36 GlaxoSmithKline R&D and has received consultancy or speakers fees from Astra Zeneca, Bayer,
- 37 Blade Therapeutics, Boehringer Ingelheim, Bristol-Myers Squibb, Galapagos, Galecto,
- 38 GlaxoSmithKline R&D, Indalo, IQVIA, Pliant, Respivot, Roche and Theravance.
- 39
- 40 • WDCM reports personal fees from Jazz Pharmaceuticals, personal fees from Mundipharma,
- 41 personal fees from Novartis, grants from Pfizer, non-financial support from GSK, grants from
- 42
- 43
- 44
- 45
- 46
- 47
- 48
- 49
- 50
- 51
- 52
- 53
- 54
- 55
- 56
- 57
- 58
- 59
- 60

1 National Institute for Health Research, grants from British Lung Foundation, outside the submitted  
2  
3 work.  
4

5 **Funding statement:** This work was supported by a British Lung Foundation IPF Project Grant (grant number  
6  
7 IPF/PG/17-15).  
8  
9

10  
11  
12  
13 **Data sharing statement:** We did not obtain participant consent to share data.  
14  
15  
16  
17  
18  
19  
20  
21  
22  
23  
24  
25  
26  
27  
28  
29  
30  
31  
32  
33  
34  
35  
36  
37  
38  
39  
40  
41  
42  
43  
44  
45  
46  
47  
48  
49  
50  
51  
52  
53  
54  
55  
56  
57  
58  
59  
60

For peer review only



1  
2  
3  
4  
5  
6  
7  
8  
9  
10  
11  
12  
13  
14  
15  
16  
17  
18  
19  
20  
21  
22  
23  
24  
25  
26  
27  
28  
29  
30  
31  
32  
33  
34  
35  
36  
37  
38  
39  
40  
41  
42  
43  
44  
45  
46  
47  
48  
49  
50  
51  
52  
53  
54  
55  
56  
57  
58  
59  
60  
**REFERENCES**

1. Fell CD. Idiopathic pulmonary fibrosis: phenotypes and comorbidities. *Clinics in Chest Medicine* 2012;33(1):51-57.
2. Holland AE, Fiore JF, Bell EC, et al. Dyspnoea and comorbidity contribute to anxiety and depression in interstitial lung disease. *Respirology* 2014;19(8):1215-21.
3. Nishiyama O, Taniguchi H, Kondoh Y, et al. Quadriceps weakness is related to exercise capacity in idiopathic pulmonary fibrosis. *Chest* 2005;127(6):2028-33.
4. Mendes P, Wickerson L, Helm D, et al. Skeletal muscle atrophy in advanced interstitial lung disease. *Respirology* 2015;20(6):953-59.
5. Mendoza L, Gogali A, Shrikrishna D, et al. Quadriceps strength and endurance in fibrotic idiopathic interstitial pneumonia. *Respirology* 2014;19(1):138-43.
6. NICE. Idiopathic pulmonary fibrosis: The diagnosis and management of suspected idiopathic pulmonary fibrosis 2013 [Available from: <https://www.nice.org.uk/guidance/cg163/chapter/introduction> accessed 10th January 2019.
7. Dowman L, Hill CJ, Holland AE. Pulmonary rehabilitation for interstitial lung disease. *Cochrane Database of Systematic Reviews* 2014(10)
8. Nishiyama O, Kondoh Y, Kimura T, et al. Effects of pulmonary rehabilitation in patients with idiopathic pulmonary fibrosis. *Respirology* 2008;13(3):394-99.
9. Vainshelboim B, Oliveira J, Yehoshua L, et al. Exercise training-based pulmonary rehabilitation program is clinically beneficial for idiopathic pulmonary fibrosis. *Respiration* 2014;88(5):378-88.
10. Holland AE, Hill CJ, Conron M, et al. Short term improvement in exercise capacity and symptoms following exercise training in interstitial lung disease. *Thorax* 2008;63(6):549-54.

- 1 11. NICE. Electrical stimulation to improve muscle strength in chronic respiratory conditions, chronic heart  
2 failure and chronic kidney disease 2020 [Available from: <https://www.nice.org.uk/guidance/ipg677>  
3 accessed 16th December 2020.  
4  
5
- 6 12. Jones S, Man WDC, Gao W, et al. Neuromuscular electrical stimulation for muscle weakness in adults  
7 with advanced disease. *Cochrane Database of Systematic Reviews* 2016(10)  
8  
9
- 10 13. Eldridge SM, Chan CL, Campbell MJ, et al. CONSORT 2010 statement: extension to randomised pilot and  
11 feasibility trials. *bmj* 2016;355:i5239.  
12  
13
- 14 14. Raghu G, Collard HR, Egan JJ, et al. An official ATS/ERS/JRS/ALAT statement: idiopathic pulmonary  
15 fibrosis: evidence-based guidelines for diagnosis and management. *Am J Respir Crit Care Med*  
16 2011;183(6):788-824. doi: 10.1164/rccm.2009-040GL  
17  
18
- 19 15. Seymour J, Spruit M, Hopkinson N, et al. The prevalence of quadriceps weakness in COPD and the  
20 relationship with disease severity. *European Respiratory Journal* 2010;36(1):81-88.  
21  
22
- 23 16. Maddocks M, Nolan CM, Man WD, et al. Neuromuscular electrical stimulation to improve exercise  
24 capacity in patients with severe COPD: a randomised double-blind, placebo-controlled trial. *The*  
25 *Lancet Respiratory Medicine* 2016;4(1):27-36.  
26  
27
- 28 17. Holland AE, Spruit MA, Troosters T, et al. An official European Respiratory Society/American Thoracic  
29 Society technical standard: field walking tests in chronic respiratory disease. *European Respiratory*  
30 *Journal* 2014;44(6):1428-46.  
31  
32
- 33 18. Patel MS, Mohan D, Andersson YM, et al. Phenotypic characteristics associated with reduced short  
34 physical performance battery score in COPD. *Chest* 2014;145(5):1016-24.  
35  
36
- 37 19. Nolan CM, Maddocks M, Maher TM, et al. Phenotypic characteristics associated with slow gait speed in  
38 idiopathic pulmonary fibrosis. *Respirology* 2018;23(5):498-506.  
39  
40
- 41 20. Canavan JL, Maddocks M, Nolan CM, et al. Functionally relevant cut point for isometric quadriceps  
42 muscle strength in chronic respiratory disease. *American journal of respiratory and critical care*  
43 *medicine* 2015;192(3):395-97.  
44  
45  
46  
47  
48  
49  
50  
51  
52  
53  
54  
55  
56  
57  
58  
59  
60

- 1  
2  
3  
4  
5  
6  
7  
8  
9  
10  
11  
12  
13  
14  
15  
16  
17  
18  
19  
20  
21  
22  
23  
24  
25  
26  
27  
28  
29  
30  
31  
32  
33  
34  
35  
36  
37  
38  
39  
40  
41  
42  
43  
44  
45  
46  
47  
48  
49  
50  
51  
52  
53  
54  
55  
56  
57  
58  
59  
60
21. Nolan CM, Birring SS, Maddocks M, et al. King's Brief Interstitial Lung Disease questionnaire: responsiveness and minimum clinically important difference. *European Respiratory Journal* 2019;54(3)
  22. Garrod R, Bestall J, Paul E, et al. Development and validation of a standardized measure of activity of daily living in patients with severe COPD: the London Chest Activity of Daily Living scale (LCADL). *Respiratory medicine* 2000;94(6):589-96.
  23. Nolan CM, Maddocks M, Canavan JL, et al. Pedometer Step Count Targets during Pulmonary Rehabilitation in Chronic Obstructive Pulmonary Disease. A Randomized Controlled Trial. *American journal of respiratory and critical care medicine* 2017;195(10):1344-52.
  24. Malterud K, Siersma VD, Guassora AD. Sample Size in Qualitative Interview Studies: Guided by Information Power. *Qualitative health research* 2016;26(13):1753-60. doi: 10.1177/1049732315617444 [published Online First: 2015/11/29]
  25. Gale NK, Heath G, Cameron E, et al. Using the framework method for the analysis of qualitative data in multi-disciplinary health research. *BMC medical research methodology* 2013;13(1):1-8.
  26. O'Cathain A, Murphy E, Nicholl J. Three techniques for integrating data in mixed methods studies. *Bmj* 2010;341
  27. Watanabe F, Taniguchi H, Sakamoto K, et al. Quadriceps weakness contributes to exercise capacity in nonspecific interstitial pneumonia. *Respiratory medicine* 2013;107(4):622-28.

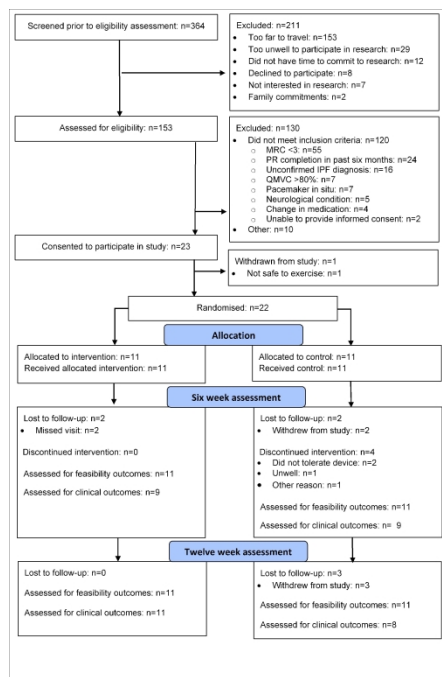

Figure 1. CONSORT diagram

458x314mm (240 x 240 DPI)

1  
2  
3 **Muscle stimulation in advanced idiopathic pulmonary fibrosis: a randomised placebo-controlled**  
4  
5  
6 **feasibility study**

7  
8  
9 **Online supplement**

10  
11  
12  
13  
14 **MATERIALS AND METHODS**

15  
16  
17 **Interventions**



23  
24  
25  
26  
27  
28  
29  
30  
31  
32  
33  
34  
35  
36  
37  
38  
39  
40  
41  
42  
43 **Figure 1: Image of the a) active and b) placebo NMES device**

44  
45  
46 *Abbreviations: NMES: Neuromuscular Electrical Stimulation*

47  
48  
49  
50 **Note: The person depicted is not patient and these images were taken with the participant's**  
51 **knowledge.**

1  
2  
3  
4  
5  
6 *Home exercise programme:*  
7  
8

9 Participants in both groups were provided with an individualised home exercise programme  
10 supplemented with a manual in which they were instructed to perform exercises at least three  
11 times per week. The programme included prescribed aerobic and resistance exercises specific to  
12 each participant. For aerobic exercise e.g. walking, participants were prescribed an exercise  
13 intensity of Borg CR10 Dyspnoea score 3 to 4<sup>1</sup> and distance was progressed to a maximum of 30  
14 minutes. Upper and lower limb resistance exercise was prescribed and progressed in line with the  
15 American College of Sports Medicine guidelines.<sup>2</sup> Participants were provided with a simple diary to  
16 record home exercise performance. Over the six-week intervention period, the unblinded  
17 researcher telephoned participants weekly to review performance and progress home exercises.  
18 To progress the exercise programme, participants were asked to increase the intensity or duration  
19 of aerobic exercise or the intensity or volume of resistance training. The home exercise manual can  
20 be provided on application to the authors.  
21  
22  
23  
24  
25  
26  
27  
28  
29  
30  
31  
32  
33  
34  
35  
36  
37  
38  
39  
40  
41  
42  
43  
44  
45  
46  
47  
48  
49  
50  
51  
52  
53  
54  
55  
56  
57  
58  
59  
60

## RESULTS

Table S1. Missing data in clinical outcomes

| Outcome                            | All | Intervention group | Control group |
|------------------------------------|-----|--------------------|---------------|
| 6MWT baseline                      | 0   | 0                  | 0             |
| 6MWT 6 weeks                       | 5   | 2                  | 3             |
| 6MWT 12 weeks                      | 6   | 1                  | 5             |
| SPPB baseline                      | 0   | 0                  | 0             |
| SPPB 6 weeks                       | 5   | 3                  | 2             |
| SPPB 12 weeks                      | 5   | 1                  | 4             |
| Four metre gait speed baseline     | 0   | 0                  | 0             |
| Four metre gait speed 6 weeks      | 5   | 3                  | 2             |
| Four metre gait speed 12 weeks     | 5   | 1                  | 4             |
| QMVC baseline                      | 0   | 0                  | 0             |
| QMVC 6 weeks                       | 5   | 2                  | 3             |
| QMVC 12 weeks                      | 4   | 0                  | 4             |
| Rectus femoris CSA baseline        | 0   | 0                  | 0             |
| Rectus femoris CSA 6 weeks         | 5   | 2                  | 3             |
| Rectus femoris CSA 12 weeks        | 4   | 0                  | 4             |
| KBILD (domains and total) baseline | 0   | 0                  | 0             |
| KBILD (domains and total) 6 weeks  | 4   | 2                  | 2             |
| KBILD (domains and total) 12 weeks | 3   | 0                  | 3             |
| EQ5D5L (domains) 12 weeks          | 3   | 0                  | 3             |
| LCADL (domains and total) baseline | 0   | 0                  | 0             |
| LCADL (domains and total) 6 weeks  | 4   | 2                  | 2             |
| LCADL (domains and total) 12 weeks | 3   | 0                  | 3             |
| Physical activity data baseline    | 8   | 4                  | 4             |
| Physical activity data 6 weeks     | 11  | 5                  | 6             |
| Physical activity data 12 weeks    | 11  | 5                  | 6             |

1  
2  
3 Data presented as number.  
4

5 *Abbreviations: 6MWT: Six Minute Walk Test; CI: Confidence Interval; EQ5D5L: EQ5D 5-Levels;*  
6 *KBILD: King's Brief Interstitial Lung Disease questionnaire; LCADL: London Chest Activities of Daily*  
7 *Living questionnaire; QMVC: Quadriceps Maximum Voluntary Contraction; SPPB: Short Physical*  
8 *Performance Battery.*  
9  
10  
11  
12  
13  
14  
15  
16

## 17 REFERENCES

- 18 1. Borg G. Borg's perceived exertion and pain scales: Human kinetics 1998.
- 19 2. Kraemer W, Adams K, Cafarelli E, et al. American College. of Sports Medicine. American College  
20  
21  
22  
23 of Sports Medicine position stand. Progression models in resistance training for healthy  
24  
25  
26  
27  
28 adults. *Med Sci Sports Exerc* 2002;34(2):364-80.  
29  
30  
31  
32  
33  
34  
35  
36  
37  
38  
39  
40  
41  
42  
43  
44  
45  
46  
47  
48  
49  
50  
51  
52  
53  
54  
55  
56  
57  
58  
59  
60





## CONSORT 2010 checklist of information to include when reporting a pilot or feasibility trial\*

| Section/Topic                    | Item No | Checklist item                                                                                                                                                                              | Reported on page No |
|----------------------------------|---------|---------------------------------------------------------------------------------------------------------------------------------------------------------------------------------------------|---------------------|
| <b>Title and abstract</b>        |         |                                                                                                                                                                                             |                     |
|                                  | 1a      | Identification as a pilot or feasibility randomised trial in the title                                                                                                                      | 1                   |
|                                  | 1b      | Structured summary of pilot trial design, methods, results, and conclusions (for specific guidance see CONSORT abstract extension for pilot trials)                                         | 4, 5                |
| <b>Introduction</b>              |         |                                                                                                                                                                                             |                     |
| Background and objectives        | 2a      | Scientific background and explanation of rationale for future definitive trial, and reasons for randomised pilot trial                                                                      | 6, 7                |
|                                  | 2b      | Specific objectives or research questions for pilot trial                                                                                                                                   | 7                   |
| <b>Methods</b>                   |         |                                                                                                                                                                                             |                     |
| Trial design                     | 3a      | Description of pilot trial design (such as parallel, factorial) including allocation ratio                                                                                                  | 7, 8                |
|                                  | 3b      | Important changes to methods after pilot trial commencement (such as eligibility criteria), with reasons                                                                                    | NA                  |
| Participants                     | 4a      | Eligibility criteria for participants                                                                                                                                                       | 7                   |
|                                  | 4b      | Settings and locations where the data were collected                                                                                                                                        | 7                   |
|                                  | 4c      | How participants were identified and consented                                                                                                                                              | 7, 8                |
| Interventions                    | 5       | The interventions for each group with sufficient details to allow replication, including how and when they were actually administered                                                       | 8, 9                |
| Outcomes                         | 6a      | Completely defined prespecified assessments or measurements to address each pilot trial objective specified in 2b, including how and when they were assessed                                | 9, 10               |
|                                  | 6b      | Any changes to pilot trial assessments or measurements after the pilot trial commenced, with reasons                                                                                        | NA                  |
|                                  | 6c      | If applicable, prespecified criteria used to judge whether, or how, to proceed with future definitive trial                                                                                 | NA                  |
| Sample size                      | 7a      | Rationale for numbers in the pilot trial                                                                                                                                                    | 10                  |
|                                  | 7b      | When applicable, explanation of any interim analyses and stopping guidelines                                                                                                                | NA                  |
| Randomisation:                   |         |                                                                                                                                                                                             |                     |
| Sequence generation              | 8a      | Method used to generate the random allocation sequence                                                                                                                                      | 7, 8                |
|                                  | 8b      | Type of randomisation(s); details of any restriction (such as blocking and block size)                                                                                                      | 7, 8                |
| Allocation concealment mechanism | 9       | Mechanism used to implement the random allocation sequence (such as sequentially numbered containers), describing any steps taken to conceal the sequence until interventions were assigned | 7, 8                |

|                                                      |     |                                                                                                                                                                                       |           |
|------------------------------------------------------|-----|---------------------------------------------------------------------------------------------------------------------------------------------------------------------------------------|-----------|
| Implementation                                       | 10  | Who generated the random allocation sequence, who enrolled participants, and who assigned participants to interventions                                                               | 7, 8      |
| Blinding                                             | 11a | If done, who was blinded after assignment to interventions (for example, participants, care providers, those assessing outcomes) and how                                              | 8, 9      |
|                                                      | 11b | If relevant, description of the similarity of interventions                                                                                                                           | NA        |
| Statistical methods                                  | 12  | Methods used to address each pilot trial objective whether qualitative or quantitative                                                                                                | 10, 11    |
| <b>Results</b>                                       |     |                                                                                                                                                                                       |           |
| Participant flow (a diagram is strongly recommended) | 13a | For each group, the numbers of participants who were approached and/or assessed for eligibility, randomly assigned, received intended treatment, and were assessed for each objective | 11        |
|                                                      | 13b | For each group, losses and exclusions after randomisation, together with reasons                                                                                                      | 11, 12    |
| Recruitment                                          | 14a | Dates defining the periods of recruitment and follow-up                                                                                                                               | 7         |
|                                                      | 14b | Why the pilot trial ended or was stopped                                                                                                                                              | NA        |
| Baseline data                                        | 15  | A table showing baseline demographic and clinical characteristics for each group                                                                                                      | 14, 15    |
| Numbers analysed                                     | 16  | For each objective, number of participants (denominator) included in each analysis. If relevant, these numbers should be by randomised group                                          | 12, 14-19 |
| Outcomes and estimation                              | 17  | For each objective, results including expressions of uncertainty (such as 95% confidence interval) for any estimates. If relevant, these results should be by randomised group        | 12, 14-19 |
| Ancillary analyses                                   | 18  | Results of any other analyses performed that could be used to inform the future definitive trial                                                                                      | 20, 21    |
| Harms                                                | 19  | All important harms or unintended effects in each group (for specific guidance see CONSORT for harms)                                                                                 | 13        |
|                                                      | 19a | If relevant, other important unintended consequences                                                                                                                                  | NA        |
| <b>Discussion</b>                                    |     |                                                                                                                                                                                       |           |
| Limitations                                          | 20  | Pilot trial limitations, addressing sources of potential bias and remaining uncertainty about feasibility                                                                             | 25        |
| Generalisability                                     | 21  | Generalisability (applicability) of pilot trial methods and findings to future definitive trial and other studies                                                                     | 21-25     |
| Interpretation                                       | 22  | Interpretation consistent with pilot trial objectives and findings, balancing potential benefits and harms, and considering other relevant evidence                                   | 21-25     |
|                                                      | 22a | Implications for progression from pilot to future definitive trial, including any proposed amendments                                                                                 | 22-25     |
| <b>Other information</b>                             |     |                                                                                                                                                                                       |           |
| Registration                                         | 23  | Registration number for pilot trial and name of trial registry                                                                                                                        | 5, 7      |
| Protocol                                             | 24  | Where the pilot trial protocol can be accessed, if available                                                                                                                          | NA        |
| Funding                                              | 25  | Sources of funding and other support (such as supply of drugs), role of funders                                                                                                       | 2, 3      |
|                                                      | 26  | Ethical approval or approval by research review committee, confirmed with reference number                                                                                            | 7         |

1 Citation: Eldridge SM, Chan CL, Campbell MJ, Bond CM, Hopewell S, Thabane L, et al. CONSORT 2010 statement: extension to randomised pilot and feasibility trials. BMJ. 2016;355.

2 \*We strongly recommend reading this statement in conjunction with the CONSORT 2010, extension to randomised pilot and feasibility trials, Explanation and Elaboration for important  
3 clarifications on all the items. If relevant, we also recommend reading CONSORT extensions for cluster randomised trials, non-inferiority and equivalence trials, non-pharmacological  
4 treatments, herbal interventions, and pragmatic trials. Additional extensions are forthcoming: for those and for up to date references relevant to this checklist, see [www.consort-statement.org](http://www.consort-statement.org).  
5  
6  
7  
8  
9  
10  
11  
12  
13  
14  
15  
16  
17  
18  
19  
20  
21  
22  
23  
24  
25  
26  
27  
28  
29  
30  
31  
32  
33  
34  
35  
36  
37  
38  
39  
40  
41  
42

For peer review only
